# Supplementary material
Source: publisher figshare collection journal article supplement (https://gsajournals.figshare.com/ndownloader/files/27772134)
Supplement: Supplementary file 1 [file 27772134]

## Sheet: GO terms
Data S3. GO terms enriched in sh4 DEGs with functional annotations.
a Fisher’s exact test for GO term enrichment.
GO term	gene	locus	Description	WT	sh4	log2(fold_change)	test_stat	p_value	q_value
GO:0045735 nutrient reservoir activity	Zm00001d011853	8:162805916-162807020	Germin-like protein 1-3	1.31251	8.37682	2.67408	3.80228	0.00095	0.00406591
	Zm00001d025059	10:102054801-102055944	Germin-like protein 8-12	83.3911	344.067	2.04472	5.86547	5e-05	0.00031057
	Zm00001d004401	2:109327003-109328229	Germin-like protein 8-12	8.55871	34.9956	2.03171	4.10769	5e-05	0.00031057
	Zm00001d008210	8:1296795-1298016	Germin-like protein 5-1	3.24637	9.38847	1.53206	1.88863	0.0009	0.00389168
	Zm00001d040519	3:47878959-47880339	Germin-like protein 1-1	4.50061	12.2417	1.44361	2.20871	0.00095	0.00406591
	Zm00001d029062	1:56855735-56858177	Vicilin-like seed storage protein At2g28490	176.64	87.9805	-1.00556	-2.83323	5e-05	0.00031057
	Zm00001d048176	9:151547407-151550218	Vicilin-like seed storage protein At2g18540	525.401	234.472	-1.164	-2.57697	5e-05	0.00031057
	Zm00001d035700	6:41696311-41698431	Glutelin type-B 1	4592.53	992.728	-2.20982	-3.90999	5e-05	0.00031057
	Zm00001d035760	6:46129119-46129656	Zein-beta	110980	7901.23	-3.81208	-3.67877	5e-05	0.00031057
	Zm00001d005793	2:188849022-188849574	16 kDa gamma-zein	59790.7	3384.09	-4.14308	-6.92898	5e-05	0.00031057
	Zm00001d048817	4:5939852-5940653	22 kDa alpha-zein 14	1267.68	34.7445	-5.18926	-12.6468	5e-05	0.00031057
	Zm00001d048813	4:5909077-5909878	22 kDa alpha-zein 8	4611.45	103.869	-5.47239	-11.6357	5e-05	0.00031057
	Zm00001d048809	4:5874885-5875686	22 kDa alpha-zein 4	12346.7	275.457	-5.48615	-9.62815	5e-05	0.00031057
	Zm00001d048812	4:5897750-5898554	22 kDa alpha-zein 8	11680	249.706	-5.54767	-9.55058	5e-05	0.00031057
	Zm00001d048808	4:5850647-5851046	Protein FLOURY 2	1890.67	39.2822	-5.58888	-10.4579	5e-05	0.00031057
	Zm00001d048810	4:5880092-5880632	#N/A	607.103	11.0705	-5.77715	-10.149	5e-05	0.00031057
	Zm00001d048851	4:6353979-6354684	Zein-alpha A30	2482.85	44.2263	-5.81095	-12.4066	5e-05	0.00031057
	Zm00001d048849	4:6345100-6345805	Zein-alpha A30	5963.28	106.084	-5.81283	-8.89298	5e-05	0.00031057
	Zm00001d048816	4:5927152-5927953	#N/A	4234.58	72.6328	-5.86545	-12.4684	5e-05	0.00031057
	Zm00001d020591	7:123954262-123955189	50 kDa gamma-zein	20402.3	339.427	-5.90949	-6.60988	5e-05	0.00031057
	Zm00001d048818	4:5943969-5944767	#N/A	485.585	6.66764	-6.1864	-11.9935	5e-05	0.00031057
	Zm00001d019155	7:19534999-19549755	Zein-alpha A20	9783.6	117.653	-6.37776	-11.5977	5e-05	0.00031057
	Zm00001d048850	4:6349539-6350244	Zein-alpha A30	2779.75	23.7132	-6.87312	-13.5844	5e-05	0.00031057
	Zm00001d048848	4:6333302-6334007	Zein-alpha 19B1	7197.51	57.0174	-6.97995	-11.7966	5e-05	0.00031057
	Zm00001d019160	7:19593330-19594177	#N/A	326.964	2.37891	-7.10269	-7.81825	5e-05	0.00031057
	Zm00001d049476	4:31588159-31589091	Zein-alpha 19A2 (Fragment)	4762.39	26.1024	-7.51136	-10.636	5e-05	0.00031057
	Zm00001d049243	4:22579360-22580152	22 kDa alpha-zein 16	38358.3	189.747	-7.65932	-11.5957	5e-05	0.00031057
	Zm00001d048847	4:6292791-6293595	Zein-alpha Z4	4363.99	19.082	-7.83729	-13.927	5e-05	0.00031057
	Zm00001d030855	1:163526101-163526827	Zein-alpha 19D1	10041.2	25.4226	-8.62561	-14.4049	5e-05	0.00031057
	Zm00001d048852	4:6358441-6359146	Zein-alpha A30	1187.58	2.87058	-8.69246	-14.9232	5e-05	0.00031057
GO:0005975 carbohydrate metabolic process	Zm00001d009936	8:90588928-90590148	Chitinase 2	1.11829	99.2205	6.47127	7.69161	5e-05	0.00031057	hydrolase activity (GO:0016787)
	Zm00001d033300	1:258063192-258065454	Type IV inositol polyphosphate 5-phosphatase 11	1.77794	48.7862	4.77819	8.04487	5e-05	0.00031057	hydrolase activity (GO:0016787)
	Zm00001d016708	5:173403816-173408283	Beta-fructofuranosidase, cell wall isozyme	5.6075	106.363	4.24549	9.51303	5e-05	0.00031057	hydrolase activity (GO:0016787)
	Zm00001d009060	8:33883209-33886191	Beta-D-xylosidase 3	1.13233	19.3895	4.09791	6.78455	5e-05	0.00031057	hydrolase activity (GO:0016787)
	Zm00001d021026	7:140795171-140796635	UDP-glucuronate 4-epimerase 6	2.49618	24.0652	3.26915	4.4721	5e-05	0.00031057
	Zm00001d049028	4:13011115-13012047	Chitinase 2	3.62547	26.6129	2.87589	4.1665	5e-05	0.00031057	hydrolase activity (GO:0016787)
	Zm00001d002192	2:7733219-7735393	#N/A	5.6606	37.063	2.71095	4.58374	5e-05	0.00031057	hydrolase activity (GO:0016787)
	Zm00001d020583	7:123675724-123676681	Beta-1,3-galactosyltransferase pvg3	1.17996	7.57997	2.68346	2.84142	0.0011	0.00460096
	Zm00001d032695	1:234902657-234908089	Malate dehydrogenase, cytoplasmic	126.256	793.346	2.6516	7.56285	5e-05	0.00031057
	Zm00001d028952	1:52672157-52680876	Alpha-L-arabinofuranosidase 1	1.00574	6.25753	2.63734	5.39108	5e-05	0.00031057	hydrolase activity (GO:0016787)
	Zm00001d023301	10:2367345-2373054	Probable galacturonosyltransferase 7	2.74338	16.6613	2.60248	6.71611	5e-05	0.00031057
	Zm00001d009908	8:88820371-88824486	UDP-glucuronic acid decarboxylase 4	11.7657	65.6482	2.48017	5.72656	5e-05	0.00031057
	Zm00001d043988	3:215679091-215679979	Acidic endochitinase	1.31264	7.25548	2.4666	3.25568	0.001	0.00424841	hydrolase activity (GO:0016787)
	Zm00001d045451	9:22640912-22645485	Transketolase, chloroplastic	7.95563	43.0583	2.43624	6.86749	5e-05	0.00031057
	Zm00001d022082	7:169730584-169732890	COBRA-like protein 6	3.68854	19.1394	2.37542	4.35773	5e-05	0.00031057
	Zm00001d052170	4:181660208-181663641	Galactoside 2-alpha-L-fucosyltransferase	1.00636	5.20255	2.37007	3.37478	5e-05	0.00031057
	Zm00001d019163	7:19750769-19754324	Probable galactinol--sucrose galactosyltransferase 2	4.20574	20.8763	2.31144	4.71518	5e-05	0.00031057	hydrolase activity (GO:0016787)
	Zm00001d003190	2:35066061-35067313	Endochitinase A	70.1222	333.075	2.2479	6.16236	5e-05	0.00031057	hydrolase activity (GO:0016787)
	Zm00001d040650	3:56240763-56246825	Pectinesterase 1	1.87136	8.83843	2.2397	3.66897	5e-05	0.00031057	hydrolase activity (GO:0016787)
	Zm00001d017830	5:208016508-208023474	Pyrophosphate--fructose 6-phosphate 1-phosphotransferase subunit alpha	7.2971	33.9498	2.21801	5.36562	5e-05	0.00031057
	Zm00001d043509	3:202333698-202335784	Probable pectinesterase 53	1.58832	7.27749	2.19594	1.9136	0.00015	0.000830091	hydrolase activity (GO:0016787)
	Zm00001d046182	9:70088768-70092051	Uncharacterized protein At1g04910	3.12231	13.7532	2.13908	4.39957	5e-05	0.00031057
	Zm00001d002943	2:27769844-27779192	Proteinaceous RNase P 1, chloroplastic/mitochondrial	18.6386	81.9121	2.13579	3.73354	5e-05	0.00031057	hydrolase activity (GO:0016787)
	Zm00001d002410	2:12121540-12122951	Xyloglucan endotransglucosylase/hydrolase protein 24	15.4992	67.5255	2.12324	4.99593	5e-05	0.00031057	hydrolase activity (GO:0016787)
	Zm00001d031554	1:194112918-194119847	Type II inositol polyphosphate 5-phosphatase 15	1.68989	7.21506	2.09408	4.32241	5e-05	0.00031057	hydrolase activity (GO:0016787)
	Zm00001d047970	9:146682815-146686329	Probable xyloglucan endotransglucosylase/hydrolase protein 28	1.58689	6.6509	2.06735	1.6025	0.00195	0.00746888	hydrolase activity (GO:0016787)
	Zm00001d000237	B73V4_ctg44:71974-73515	0	10.2836	41.2788	2.00506	4.89076	5e-05	0.00031057
	Zm00001d033405	1:262089164-262094227	Pyruvate kinase isozyme A, chloroplastic	10.1824	40.7556	2.00092	5.70673	5e-05	0.00031057
	Zm00001d024071	10:41457089-41458519	Xyloglucan endotransglycosylase/hydrolase protein 8	12.0145	47.5561	1.98485	3.96445	5e-05	0.00031057
	Zm00001d046357	9:83801693-83806040	Beta-galactosidase 9	2.01661	7.9261	1.97468	3.52499	5e-05	0.00031057	hydrolase activity (GO:0016787)
	Zm00001d026415	10:145395973-145401877	Beta-xylosidase/alpha-L-arabinofuranosidase 1 (Fragment)	9.94192	38.7907	1.96411	4.99934	5e-05	0.00031057	hydrolase activity (GO:0016787)
	Zm00001d052103	4:179678568-179682211	Probable polygalacturonase	4.46475	17.1154	1.93864	4.35991	5e-05	0.00031057	hydrolase activity (GO:0016787)
	Zm00001d050208	4:73550490-73555374	Putative glucose-6-phosphate 1-epimerase	5.43252	20.6131	1.92387	4.62376	5e-05	0.00031057
	Zm00001d018966	7:10934094-10935021	Xylanase inhibitor protein 1	107.039	405.628	1.92202	5.63522	5e-05	0.00031057	hydrolase activity (GO:0016787)
	Zm00001d047054	9:116805363-116810796	Pyruvate kinase isozyme G, chloroplastic	4.94921	18.5387	1.90527	3.56421	5e-05	0.00031057
	Zm00001d041962	3:145905007-145908254	Glycerol-3-phosphate dehydrogenase [NAD(+)]	2.03324	7.2728	1.83873	3.50138	5e-05	0.00031057
	Zm00001d010526	8:119261911-119278968	Transposon TX1 uncharacterized 149 kDa protein	1.00638	3.58313	1.83205	2.68872	5e-05	0.00031057
	Zm00001d017978	5:211180277-211183912	Endoglucanase 7	10.2093	35.8254	1.8111	4.3161	5e-05	0.00031057	hydrolase activity (GO:0016787)
	Zm00001d042946	3:184666459-184667313	Putative pectate lyase 21	6.24756	21.8939	1.80916	2.59463	0.0001	0.00057936
	Zm00001d018965	7:10857481-10858405	Xylanase inhibitor protein 1	22.3247	76.7618	1.78175	3.80146	5e-05	0.00031057	hydrolase activity (GO:0016787)
	Zm00001d043563	3:203950867-203960201	ATP-dependent 6-phosphofructokinase 3	5.15269	17.6446	1.77583	3.876	5e-05	0.00031057
	Zm00001d021732	7:161616774-161621032	Mixed-linked glucan synthase 2	1.59028	5.4429	1.77509	2.96917	5e-05	0.00031057
	Zm00001d017699	5:204537834-204540181	Probable xyloglucan endotransglucosylase/hydrolase protein 27	5.5772	18.3752	1.72015	3.02992	5e-05	0.00031057	hydrolase activity (GO:0016787)
	Zm00001d013751	5:19237277-19239953	Alpha-1,4-glucan-protein synthase [UDP-forming]	37.7185	121.916	1.69254	4.96812	5e-05	0.00031057
	Zm00001d046210	9:72063249-72066048	Beta-glucosidase 31	1.32522	4.2636	1.68584	1.89914	0.00065	0.00296301	hydrolase activity (GO:0016787)
	Zm00001d030020	1:99945343-99950682	Pyruvate kinase isozyme G, chloroplastic	47.5726	150.764	1.66409	4.00858	5e-05	0.00031057
	Zm00001d034564	1:296458781-296462896	Probable galactinol--sucrose galactosyltransferase 2	6.88438	21.6648	1.65396	3.12179	5e-05	0.00031057	hydrolase activity (GO:0016787)
	Zm00001d043879	3:212719864-212723908	Probable glucuronosyltransferase Os01g0675500	1.44628	4.53366	1.64833	2.92006	5e-05	0.00031057
	Zm00001d003434	2:44260747-44263686	Aldose 1-epimerase	2.2653	6.99115	1.62583	2.41278	0.00035	0.00174885
	Zm00001d021304	7:148348268-148353225	Endoglucanase 24	6.55597	20.0866	1.61536	4.27237	5e-05	0.00031057	hydrolase activity (GO:0016787)
	Zm00001d026165	10:140169658-140174926	Putative glucuronosyltransferase PGSIP7	3.63348	10.6411	1.55023	3.39692	5e-05	0.00031057
	Zm00001d045431	9:21923412-21927989	Enolase 1	1483.69	4340.31	1.54861	2.08249	0.00025	0.00130155
	Zm00001d048903	4:7429244-7430150	Xylanase inhibitor protein 2	36.5112	104.367	1.51526	3.62256	5e-05	0.00031057	hydrolase activity (GO:0016787)
	Zm00001d042767	3:179140819-179142662	Glucan endo-1,3-beta-glucosidase 14	3.4119	9.74872	1.51464	2.32484	0.0004	0.00196604	hydrolase activity (GO:0016787)
	Zm00001d021119	7:143115378-143119792	Beta-glucosidase 31	41.7917	118.659	1.50553	4.57428	5e-05	0.00031057	hydrolase activity (GO:0016787)
	Zm00001d002064	2:5191812-5195757	Probable glucuronosyltransferase Os04g0650300	29.7344	84.2339	1.50227	4.42077	5e-05	0.00031057
	Zm00001d035156	6:7238032-7242155	Glyceraldehyde-3-phosphate dehydrogenase 2, cytosolic	629.062	1767.7	1.4906	3.2305	5e-05	0.00031057
	Zm00001d030012	1:99314879-99319254	Probable methyltransferase PMT2	3.15675	8.7947	1.4782	3.83974	5e-05	0.00031057
	Zm00001d018214	5:216733538-216735329	Glucan endo-1,3-beta-glucosidase 12	21.2148	58.6469	1.46699	3.75836	5e-05	0.00031057	hydrolase activity (GO:0016787)
	Zm00001d005453	2:174636122-174667515	Alpha-glucosidase 2	7.1503	19.7036	1.46238	2.59116	5e-05	0.00031057	hydrolase activity (GO:0016787)
	Zm00001d003817	2:60752442-60763179	1,4-alpha-glucan-branching enzyme 2, chloroplastic/amyloplastic	55.7277	153.503	1.4618	2.72396	5e-05	0.00031057	starch biosynthetic process; hydrolase activity (GO:0016787)
	Zm00001d029011	1:54822255-54826599	Endoglucanase 9	20.4814	56.19	1.456	4.50883	5e-05	0.00031057	hydrolase activity (GO:0016787)
	Zm00001d053798	4:241317347-241322396	Glyceraldehyde-3-phosphate dehydrogenase GAPCP2, chloroplastic	19.298	52.3124	1.4387	4.28254	5e-05	0.00031057
	Zm00001d024934	10:95624161-95627278	Probable glucuronosyltransferase Os04g0103100	5.24324	14.205	1.43787	3.02454	5e-05	0.00031057
	Zm00001d017121	5:186104975-186109690	Glyceraldehyde-3-phosphate dehydrogenase 3, cytosolic	1736.5	4686.87	1.43244	2.17191	0.00035	0.00174885
	Zm00001d008491	8:10203371-10207090	Fructose-bisphosphate aldolase 3, chloroplastic	29.1583	77.948	1.4186	4.2304	5e-05	0.00031057
	Zm00001d015383	5:87517859-87522764	Glyceraldehyde-3-phosphate dehydrogenase GAPCP1, chloroplastic	45.1494	119.736	1.40708	4.50247	5e-05	0.00031057
	Zm00001d037656	6:133140744-133141716	Xylanase inhibitor protein 1	123.82	327.611	1.40374	4.03957	5e-05	0.00031057	hydrolase activity (GO:0016787)
	Zm00001d024408	10:69366564-69372020	Putative glucose-6-phosphate 1-epimerase	15.0012	39.5559	1.39882	4.10876	5e-05	0.00031057
	Zm00001d043524	3:202714091-202717654	Glucan endo-1,3-beta-glucosidase 13	24.8421	65.3494	1.39539	3.87159	5e-05	0.00031057	hydrolase activity (GO:0016787)
	Zm00001d032703	1:235316063-235322119	Probable methyltransferase PMT8	10.5462	27.7358	1.39502	2.10642	0.0004	0.00196604
	Zm00001d016768	5:175327306-175331417	Cytosolic invertase 1	4.74042	12.4373	1.39159	3.39149	5e-05	0.00031057	hydrolase activity (GO:0016787)
	Zm00001d000099	B73V4_ctg91:203933-209968	0	9.74424	25.557	1.3911	4.01532	5e-05	0.00031057
	Zm00001d037636	6:132563361-132570425	Probable cellulose synthase A catalytic subunit 1 [UDP-forming]	14.6209	37.9806	1.37723	4.47706	5e-05	0.00031057
	Zm00001d009693	8:76211166-76215916	Protein REDUCED WALL ACETYLATION 3	3.22161	8.33097	1.3707	3.29806	5e-05	0.00031057
	Zm00001d032045	1:210458384-210460255	Probable 6-phosphogluconolactonase 4, chloroplastic	2.78653	7.19773	1.36907	2.17879	0.0006	0.00276399	hydrolase activity (GO:0016787)
	Zm00001d039131	6:170732906-170739381	Glucose-1-phosphate adenylyltransferase large subunit, chloroplastic/amyloplastic	29.4613	75.9028	1.36533	4.08039	5e-05	0.00031057	starch biosynthetic process
	Zm00001d007764	2:239261100-239265459	Hydroxyproline O-galactosyltransferase GALT6	2.70559	6.96931	1.36507	2.92994	5e-05	0.00031057
	Zm00001d012292	8:172024416-172027229	Glucan endo-1,3-beta-glucosidase 14	14.5081	36.8832	1.3461	2.96811	5e-05	0.00031057	hydrolase activity (GO:0016787)
	Zm00001d012234	8:170600287-170602763	Probable beta-1,3-galactosyltransferase 8	12.3247	31.2549	1.34253	3.16549	5e-05	0.00031057
	Zm00001d014613	5:55643858-55644731	Xyloglucan endotransglucosylase/hydrolase protein 22	130.569	328.813	1.33246	4.07938	5e-05	0.00031057	hydrolase activity (GO:0016787)
	Zm00001d018159	5:215718400-215720596	Alpha-amylase	14.5718	36.3365	1.31824	3.3005	5e-05	0.00031057	hydrolase activity (GO:0016787)
	Zm00001d020461	7:116267721-116270986	Probable methyltransferase PMT2	7.16659	17.8557	1.31702	3.78984	5e-05	0.00031057
	Zm00001d044813	9:3443964-3447970	Probable fructokinase-6, chloroplastic	3.54876	8.8255	1.31436	2.68736	5e-05	0.00031057
	Zm00001d048696	4:3440983-3444303	Probable polygalacturonase	3.5354	8.75092	1.30756	2.56417	0.0001	0.00057936	hydrolase activity (GO:0016787)
	Zm00001d033174	1:252797115-252799804	Alpha-1,4-glucan-protein synthase [UDP-forming]	200.001	491.235	1.2964	3.81062	5e-05	0.00031057
	Zm00001d035037	6:2749866-2752983	Fructokinase-2	122.42	300.667	1.29633	3.99876	5e-05	0.00031057	starch biosynthetic process
	Zm00001d039403	3:3463016-3468930	Dol-P-Man:Man(6)GlcNAc(2)-PP-Dol alpha-1,2-mannosyltransferase	8.49843	20.7971	1.29111	3.49719	5e-05	0.00031057
	Zm00001d040084	3:26931528-26935231	Fructose-bisphosphate aldolase 3, chloroplastic	35.2881	85.7163	1.28039	3.94167	5e-05	0.00031057
	Zm00001d042152	3:153901322-153906929	Probable glycerol-3-phosphate dehydrogenase [NAD(+)] 1, cytosolic	9.51851	22.7582	1.25758	3.31312	5e-05	0.00031057
	Zm00001d019149	7:19277317-19283676	Probable cellulose synthase A catalytic subunit 8 [UDP-forming]	7.83826	18.7045	1.25478	3.71924	5e-05	0.00031057
	Zm00001d047110	9:118915806-118919998	Probable trehalose-phosphate phosphatase 2	10.2928	24.5066	1.25153	3.63226	5e-05	0.00031057	hydrolase activity (GO:0016787)
	Zm00001d032267	1:219821586-219829798	Hydroxyproline O-galactosyltransferase HPGT1	2.45399	5.83379	1.2493	2.37128	0.0001	0.00057936
	Zm00001d033556	1:267103209-267108765	Polygalacturonate 4-alpha-galacturonosyltransferase	15.4645	36.7477	1.24869	3.96135	5e-05	0.00031057
	Zm00001d037059	6:110970399-110982871	Alpha-glucan water dikinase, chloroplastic	1.25751	2.98532	1.24732	2.50675	5e-05	0.00031057	starch biosynthetic process
	Zm00001d026311	10:143365794-143369286	Probable UDP-arabinose 4-epimerase 2	17.72	41.4937	1.22752	3.71333	5e-05	0.00031057
	Zm00001d040446	3:43701924-43707461	Pyruvate kinase, cytosolic isozyme	44.8339	104.245	1.21732	3.87147	5e-05	0.00031057
	Zm00001d010755	8:126969527-126978127	Alpha,alpha-trehalose-phosphate synthase [UDP-forming] 1	11.2257	25.672	1.19338	3.55284	5e-05	0.00031057	hydrolase activity (GO:0016787)
	Zm00001d027963	1:18460170-18462291	Uncharacterized mitochondrial protein ymf11	1.34881	3.07973	1.19112	1.96952	0.00205	0.0077849
	Zm00001d020692	7:128747472-128750503	Beta-1,3-galactosyltransferase 7	3.89412	8.87577	1.18857	2.40158	0.0003	0.0015276
	Zm00001d013097	5:4688273-4690690	Glucan endo-1,3-beta-glucosidase 8	10.1979	23.2087	1.1864	2.87149	5e-05	0.00031057	hydrolase activity (GO:0016787)
	Zm00001d014030	5:29404682-29410087	Malate dehydrogenase, cytoplasmic	15.7211	35.7099	1.18362	3.16286	5e-05	0.00031057
	Zm00001d011889	8:164038136-164044860	Hexokinase-3	27.7477	62.8736	1.18008	3.75703	5e-05	0.00031057
	Zm00001d032172	1:215551745-215556493	ATP-dependent 6-phosphofructokinase 5, chloroplastic	4.61608	10.4186	1.17442	2.86294	5e-05	0.00031057
	Zm00001d047797	9:142003890-142008103	UDP-glucuronic acid decarboxylase 6	25.5124	57.5298	1.17311	3.48255	5e-05	0.00031057
	Zm00001d025659	10:125277607-125279663	ATP-dependent 6-phosphofructokinase 2	4.55371	10.147	1.15594	2.23577	0.00025	0.00130155
	Zm00001d037934	6:142590234-142594536	UDP-glucuronic acid decarboxylase 4	14.0136	31.0839	1.14934	2.88434	5e-05	0.00031057
	Zm00001d049049	4:13884939-13892828	Pyruvate kinase 1, cytosolic	9.71378	21.4518	1.14299	3.32396	5e-05	0.00031057
	Zm00001d017906	5:209944101-209948357	Uncharacterized protein At1g04910	2.29194	5.0575	1.14185	2.42244	0.0003	0.0015276
	Zm00001d042333	3:161628408-161632125	Probable arabinosyltransferase ARAD1	2.79282	6.15389	1.13978	2.24782	0.00045	0.00217427
	Zm00001d034511	1:295100524-295105366	Hydroxyproline O-galactosyltransferase GALT6	1.42384	3.13127	1.13697	2.11226	0.00075	0.00334812
	Zm00001d045326	9:19060452-19065712	ATP-dependent 6-phosphofructokinase 3	1.58667	3.47381	1.13051	2.13286	0.0006	0.00276399
	Zm00001d016155	5:147482561-147503560	Putative callose synthase 8	1.76875	3.87025	1.1297	3.03895	5e-05	0.00031057
	Zm00001d052020	4:176653253-176654594	Alpha-1,6-mannosyl-glycoprotein 2-beta-N-acetylglucosaminyltransferase	3.46762	7.57237	1.1268	1.9041	0.0026	0.00948567
	Zm00001d038076	6:146985213-146990181	UDP-D-xylose:L-fucose alpha-1,3-D-xylosyltransferase MGP4	9.20646	19.9566	1.11614	2.59987	5e-05	0.00031057
	Zm00001d028653	1:41833737-41838204	UDP-glucuronic acid decarboxylase 6	25.8158	55.6688	1.10862	3.37518	5e-05	0.00031057
	Zm00001d043662	3:206196919-206222520	Alpha-amylase 3, chloroplastic	3.34956	7.1402	1.09199	2.90769	5e-05	0.00031057	hydrolase activity (GO:0016787)
	Zm00001d049510	4:32826639-32833033	Probable mixed-linked glucan synthase 6	101.219	215.714	1.09164	3.30714	5e-05	0.00031057
	Zm00001d016694	5:172814185-172820085	Poly [ADP-ribose] polymerase 3	7.75086	16.396	1.08092	2.87584	5e-05	0.00031057
	Zm00001d034990	6:1282753-1285886	Probable polygalacturonase	17.5554	36.8254	1.06879	2.83169	5e-05	0.00031057	hydrolase activity (GO:0016787)
	Zm00001d022510	7:179105093-179113606	4-alpha-glucanotransferase DPE2	6.52107	13.614	1.06192	2.353	0.00015	0.000830091
	Zm00001d022460	7:178138827-178142500	Pectinesterase 3	7.96292	16.4205	1.04413	2.35757	0.0001	0.00057936	hydrolase activity (GO:0016787)
	Zm00001d005981	2:194592767-194597099	Probable galacturonosyltransferase 4	19.1258	39.4279	1.04369	3.34117	5e-05	0.00031057
	Zm00001d047750	9:140834065-140837709	Probable glucuronosyltransferase Os03g0287800	9.69884	19.8845	1.03576	1.97131	0.00105	0.00442562
	Zm00001d023813	10:22948295-22951424	Probable polygalacturonase	11.6597	23.6418	1.01981	2.71224	5e-05	0.00031057	hydrolase activity (GO:0016787)
	Zm00001d014944	5:69327617-69329422	L-lactate dehydrogenase	36.0623	72.6372	1.01022	2.73397	5e-05	0.00031057
	Zm00001d038579	6:160393659-160396437	Phosphoglycerate kinase, chloroplastic	4.84185	9.72372	1.00595	2.08837	0.0005	0.00237556
	Zm00001d011965	8:165285678-165288425	Transaldolase	33.8935	67.9469	1.0034	3.04809	5e-05	0.00031057
	Zm00001d033110	1:250436680-250439909	Inositol monophosphatase 3	5.79152	11.5879	1.00061	2.24745	0.00055	0.00257305	hydrolase activity (GO:0016787)
	Zm00001d002853	2:24768473-24772222	Probable beta-D-xylosidase 6	1.51802	3.03711	1.00051	1.87645	0.00175	0.00680906	hydrolase activity (GO:0016787)
	Zm00001d022490	7:178662945-178667470	Xylose isomerase	16.358	8.17206	-1.00122	-2.86657	5e-05	0.00031057
	Zm00001d017895	5:209709533-209717529	Cellulose synthase-like protein E2	3.82692	1.90733	-1.00463	-2.04567	0.00065	0.00296301
	Zm00001d019282	7:25495546-25499141	Probable polygalacturonase	6.68644	3.30867	-1.01499	-1.92232	0.0013	0.0052904	hydrolase activity (GO:0016787)
	Zm00001d032605	1:231856278-231868220	Alpha-galactosidase	241.481	118.969	-1.02132	-3.17597	5e-05	0.00031057	hydrolase activity (GO:0016787)
	Zm00001d033649	1:269615025-269618990	Beta-glucosidase 7	370.407	182.225	-1.02339	-2.93192	5e-05	0.00031057	hydrolase activity (GO:0016787)
	Zm00001d018342	5:218888424-218892344	Probable alpha,alpha-trehalose-phosphate synthase [UDP-forming] 11	99.0989	48.7316	-1.02401	-3.17411	5e-05	0.00031057	hydrolase activity (GO:0016787)
	Zm00001d028267	1:28638544-28642886	Alpha,alpha-trehalose-phosphate synthase [UDP-forming] 6	53.0752	25.8079	-1.04022	-2.21878	5e-05	0.00031057	hydrolase activity (GO:0016787)
	Zm00001d039660	3:10945250-10952016	Probable cellulose synthase A catalytic subunit 1 [UDP-forming]	114.348	55.3878	-1.0458	-3.26493	5e-05	0.00031057	hydrolase activity (GO:0016787)
	Zm00001d016684	5:172412994-172430415	1,4-alpha-glucan-branching enzyme 2, chloroplastic/amyloplastic	738.948	357.718	-1.04665	-2.36391	0.0003	0.0015276	starch biosynthetic process; hydrolase activity (GO:0016787)
	Zm00001d028762	1:45868762-45896495	6-phosphofructo-2-kinase/fructose-2,6-bisphosphatase	27.3295	13.0875	-1.06227	-3.35999	5e-05	0.00031057	hydrolase activity (GO:0016787)
	Zm00001d006699	2:214602480-214605127	.	188.035	85.231	-1.14155	-3.35547	5e-05	0.00031057
	Zm00001d005658	2:182513910-182516018	Probable trehalose-phosphate phosphatase 7	25.8415	11.6318	-1.15162	-2.50206	0.0001	0.00057936	hydrolase activity (GO:0016787)
	Zm00001d029091	1:57485975-57493258	Sucrose synthase 4	37.5351	16.795	-1.1602	-2.86478	5e-05	0.00031057
	Zm00001d038104	6:148044309-148054129	Mannosylglycoprotein endo-beta-mannosidase	4.5991	2.05696	-1.16083	-2.56601	5e-05	0.00031057	hydrolase activity (GO:0016787)
	Zm00001d020396	7:111240633-111244556	Alpha,alpha-trehalose-phosphate synthase [UDP-forming] 6	56.1049	25.0151	-1.16533	-3.5864	5e-05	0.00031057	hydrolase activity (GO:0016787)
	Zm00001d028397	1:33440964-33448136	Acyl-CoA-binding domain-containing protein 3	32.2894	14.2827	-1.1768	-3.3474	5e-05	0.00031057	hydrolase activity (GO:0016787)
	Zm00001d028560	1:39154935-39163793	LRR receptor-like serine/threonine-protein kinase FEI 1	82.9514	36.559	-1.18204	-3.2859	5e-05	0.00031057
	Zm00001d039685	3:11843727-11847491	Galactinol--sucrose galactosyltransferase	7.71992	3.33489	-1.21095	-2.05089	0.0006	0.00276399
	Zm00001d017502	5:197722482-197728745	Probable trehalose-phosphate phosphatase 1	35.4296	15.2699	-1.21427	-3.31239	5e-05	0.00031057	hydrolase activity (GO:0016787)
	Zm00001d006243	2:202663870-202670238	Beta-galactosidase 12	18.8631	8.12529	-1.21507	-1.70494	0.00185	0.00713834	hydrolase activity (GO:0016787)
	Zm00001d022104	7:170386653-170389910	Pectinesterase QRT1	137.547	59.2036	-1.21617	-3.67463	5e-05	0.00031057	hydrolase activity (GO:0016787)
	Zm00001d035288	6:19435949-19439086	Stress-associated endoplasmic reticulum protein 2	720.755	306.121	-1.23541	-3.76338	5e-05	0.00031057
	Zm00001d029087	1:57457545-57464810	Sucrose synthase 4	53.0528	22.1441	-1.26051	-2.79254	5e-05	0.00031057
	Zm00001d007633	2:236564996-236567074	Stress-associated endoplasmic reticulum protein 2	51.3402	21.3494	-1.26589	-2.86531	5e-05	0.00031057
	Zm00001d009717	8:77524891-77526895	Probable polygalacturonase	5.24935	2.15243	-1.28617	-1.83725	0.00255	0.00933354	hydrolase activity (GO:0016787)
	Zm00001d041880	3:142132875-142197276	Beta-galactosidase 15	41.1926	16.3051	-1.33706	-3.33506	5e-05	0.00031057	hydrolase activity (GO:0016787)
	Zm00001d018971	7:11075376-11078232	Regulatory protein opaque-2	354.091	138.139	-1.358	-4.11775	5e-05	0.00031057	starch biosynthetic process
	Zm00001d044648	3:233938894-233949832	Alpha-L-arabinofuranosidase 1	13.5704	5.25018	-1.37002	-3.10982	5e-05	0.00031057	hydrolase activity (GO:0016787)
	Zm00001d012173	8:169516095-169525048	Fructokinase-1	28.6431	10.9349	-1.38924	-3.20331	5e-05	0.00031057	starch biosynthetic process
	Zm00001d037333	6:121792418-121824947	D-tagatose-1,6-bisphosphate aldolase subunit GatY	40.5508	15.317	-1.40459	-4.53828	5e-05	0.00031057
	Zm00001d006057	2:196697373-196700761	.	11.279	4.23409	-1.41352	-3.24311	5e-05	0.00031057
	Zm00001d031300	1:185589045-185592963	Probable galactinol--sucrose galactosyltransferase 1	14.1263	5.23547	-1.43199	-3.25366	5e-05	0.00031057
	Zm00001d022367	7:176185595-176188604	Beta-glucosidase 26	10.592	3.92276	-1.43303	-2.71087	5e-05	0.00031057	hydrolase activity (GO:0016787)
	Zm00001d053886	4:242972196-242981389	L-arabinokinase	8.00456	2.94785	-1.44116	-3.275	5e-05	0.00031057
	Zm00001d002625	2:17149610-17153983	Probable methyltransferase PMT15	20.279	7.351	-1.46397	-3.48841	5e-05	0.00031057
	Zm00001d044129	3:219979957-219989574	Glucose-1-phosphate adenylyltransferase large subunit, chloroplastic/amyloplastic (Fragment)	2905.3	1033.65	-1.49094	-2.56293	0.00025	0.00130155	starch biosynthetic process
	Zm00001d042555	3:171667232-171670207	2-alkenal reductase (NADP(+)-dependent)	11.5991	4.10131	-1.49986	-3.03994	5e-05	0.00031057	hydrolase activity (GO:0016787)
	Zm00001d032386	1:225026375-225031085	Pyrophosphate--fructose 6-phosphate 1-phosphotransferase subunit alpha	594.53	206.434	-1.52607	-4.02026	5e-05	0.00031057
	Zm00001d021667	7:159561271-159563354	Probable xyloglucan endotransglucosylase/hydrolase protein 8	58.7576	20.2371	-1.53778	-3.84885	5e-05	0.00031057	hydrolase activity (GO:0016787)
	Zm00001d020986	7:139367276-139370608	.	23.7292	7.96797	-1.57438	-4.35618	5e-05	0.00031057
	Zm00001d041972	3:146279424-146282802	Cellulose synthase-like protein G2	4.88287	1.63914	-1.5748	-2.27895	0.0004	0.00196604
	Zm00001d003277	2:38572521-38576707	Probable galactinol--sucrose galactosyltransferase 2	19.2684	6.06591	-1.66744	-4.61558	5e-05	0.00031057
	Zm00001d009177	8:41086583-41090905	Neutral/alkaline invertase 1, mitochondrial	4.51705	1.41957	-1.66993	-3.311	5e-05	0.00031057	hydrolase activity (GO:0016787)
	Zm00001d029371	1:67927388-67929661	Probable trehalose-phosphate phosphatase 9	176.199	54.2021	-1.70079	-5.06472	5e-05	0.00031057	hydrolase activity (GO:0016787)
	Zm00001d007383	2:230345637-230366608	Alpha-mannosidase At3g26720	23.0307	7.03651	-1.71063	-4.20302	5e-05	0.00031057	hydrolase activity (GO:0016787)
	Zm00001d043986	3:215646671-215656976	Pyruvate kinase isozyme G, chloroplastic	91.6293	27.3493	-1.74431	-3.53993	5e-05	0.00031057
	Zm00001d029164	1:60874572-60876557	Inactive beta-amylase 9	3.52121	1.03185	-1.77084	-1.99946	0.0025	0.00918832	hydrolase activity (GO:0016787)
	Zm00001d032333	1:222796869-222804025	Phosphoglucan phosphatase LSF1, chloroplastic	21.5136	6.20084	-1.79471	-4.79636	5e-05	0.00031057	starch biosynthetic process; hydrolase activity (GO:0016787)
	Zm00001d035512	6:30481709-30486777	Floral homeotic protein APETALA 2	18.9502	5.37799	-1.81707	-3.04967	5e-05	0.00031057	starch biosynthetic process
	Zm00001d002135	2:6449295-6454805	FGGY carbohydrate kinase domain-containing protein	7.49367	2.06673	-1.85832	-3.58526	5e-05	0.00031057
	Zm00001d050155	4:69592906-69594252	Probable gluconokinase	34.0949	9.22827	-1.88542	-3.25246	5e-05	0.00031057	hydrolase activity (GO:0016787)
	Zm00001d033937	1:279124551-279128540	Granule-bound starch synthase 1, chloroplastic/amyloplastic	31.8498	7.65275	-2.05723	-3.11366	5e-05	0.00031057	starch biosynthetic process
	Zm00001d003247	2:37815901-37818424	Malate synthase, glyoxysomal	442.915	103.266	-2.10067	-6.3532	5e-05	0.00031057
	Zm00001d039066	6:169497056-169501065	Putative glucose-6-phosphate 1-epimerase	75.3959	17.2136	-2.13094	-5.70849	5e-05	0.00031057
	Zm00001d008435	8:8639916-8642774	Beta-glucosidase 1	10.6235	2.31397	-2.19881	-3.58188	5e-05	0.00031057	hydrolase activity (GO:0016787)
	Zm00001d028471	1:35960440-35964750	Phosphoenolpyruvate carboxykinase [ATP]	17.0268	3.46765	-2.29578	-4.44009	5e-05	0.00031057
	Zm00001d004438	2:111722005-111775606	Pullulanase 1, chloroplastic	103.724	19.5648	-2.40641	-6.00137	5e-05	0.00031057	starch biosynthetic process; hydrolase activity (GO:0016787)
	Zm00001d006161	2:200087622-200089298	Alpha-L-fucosidase 1	5.93493	1.11353	-2.41409	-2.99935	5e-05	0.00031057	hydrolase activity (GO:0016787)
	Zm00001d036608	6:94231653-94235649	Probable alpha-glucosidase Os06g0675700	1873.22	340.698	-2.45895	-5.70426	5e-05	0.00031057	hydrolase activity (GO:0016787)
	Zm00001d045462	9:23107328-23111318	Granule-bound starch synthase 1, chloroplastic/amyloplastic	23.4732	4.25621	-2.46337	-3.14079	5e-05	0.00031057	starch biosynthetic process
	Zm00001d045042	9:10906933-10912944	Sucrose synthase 1; Sh1	8305.37	1371.71	-2.59807	-3.15099	5e-05	0.00031057
	Zm00001d048099	9:150152052-150157292	Beta-glucosidase 6	36.555	5.68456	-2.68495	-5.9778	5e-05	0.00031057	hydrolase activity (GO:0016787)
	Zm00001d039512	3:6248364-6252317	Hexokinase-8	477.406	71.019	-2.74894	-5.402	5e-05	0.00031057
	Zm00001d025847	10:131489755-131495677	Probable inactive beta-glucosidase 14	176.418	25.4767	-2.79175	-8.13251	5e-05	0.00031057	hydrolase activity (GO:0016787)
	Zm00001d001941	2:3201230-3204850	Beta-fructofuranosidase, insoluble isoenzyme 7	9.35073	1.27647	-2.87291	-4.20456	5e-05	0.00031057	hydrolase activity (GO:0016787)
	Zm00001d010172	8:102868667-102871737	Fructose-1,6-bisphosphatase, cytosolic	19.6843	2.53184	-2.95879	-5.3984	5e-05	0.00031057	hydrolase activity (GO:0016787)
	Zm00001d015200	5:78979000-78987766	Protein PTST, chloroplastic	172.934	17.5951	-3.29698	-9.07324	5e-05	0.00031057	starch biosynthetic process
	Zm00001d038794	6:164493062-164495421	Probable pectinesterase 53	16.3993	1.2944	-3.66328	-3.56245	5e-05	0.00031057	hydrolase activity (GO:0016787)
GO:0046872 metal ion binding	Zm00001d002436	2:12637876-12640584	Ubiquinol oxidase 1a, mitochondrial	1.54022	226.26	7.1987	9.52033	5e-05	0.00031057
	Zm00001d029688	1:82827140-82831219	Cytochrome P450 704C1	1.06641	35.4621	5.05545	6.80074	5e-05	0.00031057
	Zm00001d011183	8:142217717-142219220	Thiamine thiazole synthase 1, chloroplastic	1.17189	36.1931	4.94881	7.19346	5e-05	0.00031057
	Zm00001d050011	4:59298544-59300505	Alpha carbonic anhydrase 7	3.26183	81.3445	4.64029	8.11146	5e-05	0.00031057
	Zm00001d041726	3:135359545-135361248	2'-deoxymugineic-acid 2'-dioxygenase	104.465	1463.93	3.80875	10.2278	5e-05	0.00031057
	Zm00001d017425	5:195722802-195723646	Cytochrome b5 isoform E	17.9753	248.045	3.78652	8.23855	5e-05	0.00031057
	Zm00001d008987	8:28720643-28722575	Cytochrome P450 71A1	2.13637	27.1713	3.66885	6.16214	5e-05	0.00031057
	Zm00001d027996	1:19699531-19702323	Alcohol dehydrogenase-like 7	1.37047	16.1601	3.55969	4.63451	5e-05	0.00031057
	Zm00001d021599	7:157782227-157788323	L-ascorbate oxidase homolog	1.28326	14.5675	3.50486	5.01185	5e-05	0.00031057
	Zm00001d032458	1:227387411-227388956	Cytochrome P450 89A2	1.88868	20.1244	3.4135	5.40426	5e-05	0.00031057
	Zm00001d006947	2:219989863-219991904	Cytochrome P450 709B2	7.51941	78.3792	3.38178	7.97755	5e-05	0.00031057
	Zm00001d022453	7:178050751-178052455	Cationic peroxidase 1	2.71626	27.576	3.34372	5.16039	5e-05	0.00031057
	Zm00001d044099	3:219075377-219082694	Carbonic anhydrase, chloroplastic	14.3076	142.199	3.31306	8.19672	5e-05	0.00031057
	Zm00001d006948	2:220001131-220004557	Cytochrome P450 709B2	1.22708	11.5735	3.23753	6.54871	5e-05	0.00031057
	Zm00001d046184	9:70231084-70232642	Peroxidase 52	1.95872	18.035	3.20282	4.30143	5e-05	0.00031057
	Zm00001d003051	2:30447949-30449800	dCTP pyrophosphatase 1	1.71109	15.6076	3.18926	3.61417	5e-05	0.00031057
	Zm00001d033623	1:269047816-269052874	Linoleate 9S-lipoxygenase 1	9.00481	81.198	3.17268	7.04706	5e-05	0.00031057
	Zm00001d032223	1:217837368-217838681	2-oxoglutarate-dependent dioxygenase DAO	1.58689	12.2156	2.94445	3.76458	5e-05	0.00031057
	Zm00001d006036	2:195892795-195896295	Heat shock 70 kDa protein, mitochondrial	15.7702	117.271	2.89457	8.52105	5e-05	0.00031057
	Zm00001d020013	7:85541770-85551145	.	2.68758	19.7528	2.87768	5.58916	5e-05	0.00031057
	Zm00001d048513	9:157608353-157609505	Heavy metal-associated isoprenylated plant protein 39	1.48782	10.8419	2.86535	3.53007	0.00065	0.00296301
	Zm00001d002004	2:4177226-4180187	Peroxidase 50	7.13308	49.8723	2.80564	5.44354	5e-05	0.00031057
	Zm00001d005698	2:183790604-183791147	Zinc finger AN1 domain-containing stress-associated protein 17	15.6365	108.556	2.79544	5.12396	5e-05	0.00031057
	Zm00001d012322	8:172403400-172405359	Isoflavone 2'-hydroxylase	18.3654	127.48	2.79521	6.73367	5e-05	0.00031057
	Zm00001d011495	8:152339069-152343283	Probable protein phosphatase 2C 8	2.44703	15.6814	2.67995	3.70749	5e-05	0.00031057
	Zm00001d011853	8:162805916-162807020	Germin-like protein 1-3	1.31251	8.37682	2.67408	3.80228	0.00095	0.00406591
	Zm00001d018090	5:214042873-214045954	Annexin D7	7.48208	47.1486	2.6557	6.00177	5e-05	0.00031057
	Zm00001d002544	2:15091609-15099493	E3 ubiquitin-protein ligase HERC2	1.28925	8.06759	2.64561	6.44555	5e-05	0.00031057
	Zm00001d013263	5:7387190-7388959	Protein PYRICULARIA ORYZAE RESISTANCE 21	2.54403	15.4212	2.59973	3.79672	5e-05	0.00031057
	Zm00001d053702	4:239551733-239557534	Serine/threonine protein phosphatase 2A regulatory subunit B''beta	2.58827	15.6262	2.59391	6.42782	5e-05	0.00031057
	Zm00001d030002	1:98510055-98512418	Peroxidase N	4.17823	25.1154	2.5876	3.76357	5e-05	0.00031057
	Zm00001d038065	6:146729700-146732419	Annexin D4	1.04159	6.22654	2.57965	3.14293	0.0001	0.00057936
	Zm00001d010579	8:120806360-120811444	Calcium-dependent protein kinase 16	2.04257	11.8262	2.53352	5.47671	5e-05	0.00031057
	Zm00001d034368	1:291055448-291058538	DnaJ protein homolog	4.95514	28.3838	2.51807	5.88475	5e-05	0.00031057
	Zm00001d042225	3:156802049-156804169	Heavy metal-associated isoprenylated plant protein 33	58.996	336.519	2.512	7.34424	5e-05	0.00031057
	Zm00001d008428	8:8437904-8450620	RING-box protein 1a	35.8722	204.024	2.50781	4.25044	5e-05	0.00031057
	Zm00001d052040	4:177078012-177079956	Cytochrome c oxidase copper chaperone 1	2.26227	12.8185	2.50238	2.97404	5e-05	0.00031057
	Zm00001d037769	6:136802595-136803895	Zinc finger CCCH domain-containing protein 35	1.58683	8.87466	2.48355	3.01775	0.0001	0.00057936
	Zm00001d045451	9:22640912-22645485	Transketolase, chloroplastic	7.95563	43.0583	2.43624	6.86749	5e-05	0.00031057
	Zm00001d017952	5:210781407-210782962	Probable peroxygenase 4	41.6564	222.1	2.4146	6.23545	5e-05	0.00031057
	Zm00001d042634	3:174745781-174748840	4,5-DOPA dioxygenase extradiol	32.954	173.639	2.39756	6.6094	5e-05	0.00031057
	Zm00001d048060	9:149093184-149097158	Homocysteine S-methyltransferase 1	9.42675	49.6335	2.39648	5.87739	5e-05	0.00031057
	Zm00001d008588	8:13687968-13690095	L-Ala-D/L-amino acid epimerase	1.63204	8.4913	2.37931	3.73433	5e-05	0.00031057
	Zm00001d051736	4:168565295-168566288	E3 ubiquitin-protein ligase RING1	2.02821	10.2624	2.33909	2.9002	5e-05	0.00031057
	Zm00001d015356	5:86084654-86086755	4-hydroxyphenylpyruvate dioxygenase	20.0388	97.7347	2.28607	6.16547	5e-05	0.00031057
	Zm00001d039492	3:5810143-5811850	Transcription factor DIVARICATA	2.07309	10.1012	2.28468	2.99817	5e-05	0.00031057
	Zm00001d015829	5:124544274-124549833	Probable copper-transporting ATPase HMA5	6.78676	32.9925	2.28135	6.63541	5e-05	0.00031057
	Zm00001d035659	6:39829332-39830358	.	2.21049	10.6674	2.27078	2.79827	5e-05	0.00031057
	Zm00001d008976	8:28094116-28102364	3-methyl-2-oxobutanoate hydroxymethyltransferase 1, mitochondrial	3.6159	17.1482	2.24563	2.30138	0.0019	0.00730356
	Zm00001d017830	5:208016508-208023474	Pyrophosphate--fructose 6-phosphate 1-phosphotransferase subunit alpha	7.2971	33.9498	2.21801	5.36562	5e-05	0.00031057
	Zm00001d024258	10:59906060-59918458	1-aminocyclopropane-1-carboxylate oxidase homolog 7	1.25627	5.74013	2.19194	2.1854	0.00105	0.00442562
	Zm00001d019226	7:22695879-22699262	Cadmium/zinc-transporting ATPase HMA2	1.6283	7.42661	2.18933	2.26343	5e-05	0.00031057
	Zm00001d033727	1:272347213-272357637	DNA-directed RNA polymerase I subunit RPA12	12.5971	56.9605	2.17687	4.9061	5e-05	0.00031057
	Zm00001d033624	1:269056559-269072120	Probable linoleate 9S-lipoxygenase 4	3.70838	16.6904	2.17016	3.2921	5e-05	0.00031057
	Zm00001d016691	5:172643938-172645561	Copper transport protein CCH	33.9604	152.777	2.1695	5.80843	5e-05	0.00031057
	Zm00001d026109	10:138678060-138680423	Polyphenol oxidase, chloroplastic	2.17399	9.74693	2.1646	3.28936	5e-05	0.00031057
	Zm00001d028252	1:28052352-28059866	Peroxygenase	43.0341	189.432	2.13812	6.16286	5e-05	0.00031057
	Zm00001d039575	3:8204807-8206696	1-aminocyclopropane-1-carboxylate oxidase homolog 4	6.39901	28.087	2.13398	4.23458	5e-05	0.00031057
	Zm00001d005766	2:187317765-187318308	Probable calcium-binding protein CML47	4.34029	18.6834	2.1059	2.23588	0.0016	0.00631515
	Zm00001d034387	1:291605272-291613251	Indole-3-acetaldehyde oxidase	3.0738	13.2207	2.1047	2.59222	5e-05	0.00031057
	Zm00001d044096	3:219038136-219043860	Carbonic anhydrase, chloroplastic	1.04182	4.43501	2.08983	2.07606	0.0018	0.00698199
	Zm00001d042443	3:167612706-167616683	BTB/POZ and TAZ domain-containing protein 2	1.02903	4.34901	2.0794	2.37012	0.00035	0.00174885
	Zm00001d002687	2:19283193-19284804	Cytochrome P450 86A4	13.574	57.3296	2.07844	4.657	5e-05	0.00031057
	Zm00001d026056	10:137257365-137260572	Beta-carotene 3-hydroxylase, chloroplastic	43.8934	184.947	2.07504	5.23962	5e-05	0.00031057
	Zm00001d044389	3:226830790-226834279	Calcineurin B-like protein 5	1.53059	6.43061	2.07087	3.43455	5e-05	0.00031057
	Zm00001d037410	6:124806565-124807970	Peroxidase 1	1.14879	4.82583	2.07066	2.40191	0.00115	0.004782
	Zm00001d038218	6:151836743-151842571	Cytochrome c	28.5348	119.67	2.06827	5.54333	5e-05	0.00031057
	Zm00001d050346	4:82622936-82623890	Annexin D5	1.26249	5.27318	2.0624	2.19676	0.00195	0.00746888
	Zm00001d027454	1:5603126-5604467	Heavy metal-associated isoprenylated plant protein 39	10.0474	41.8266	2.0576	4.03037	5e-05	0.00031057
	Zm00001d025059	10:102054801-102055944	Germin-like protein 8-12	83.3911	344.067	2.04472	5.86547	5e-05	0.00031057
	Zm00001d004401	2:109327003-109328229	Germin-like protein 8-12	8.55871	34.9956	2.03171	4.10769	5e-05	0.00031057
	Zm00001d013257	5:7187558-7188963	Cytochrome b5 isoform A	4.41973	17.9373	2.02093	3.33222	5e-05	0.00031057
	Zm00001d013111	5:4796151-4799203	DnaJ protein homolog	15.7104	63.7127	2.01986	5.54467	5e-05	0.00031057
	Zm00001d045599	9:28082327-28086696	Monocopper oxidase-like protein SKU5	7.3133	29.287	2.00167	5.75827	5e-05	0.00031057
	Zm00001d033405	1:262089164-262094227	Pyruvate kinase isozyme A, chloroplastic	10.1824	40.7556	2.00092	5.70673	5e-05	0.00031057
	Zm00001d009146	8:39524339-39526647	S-adenosylmethionine synthase 1	54.3496	209.503	1.94663	5.63467	5e-05	0.00031057
	Zm00001d051018	4:137141448-137142700	B-box zinc finger protein 24	1.05473	4.05389	1.94243	1.84394	0.00265	0.0096319
	Zm00001d040697	3:58920201-58921386	S-adenosylmethionine synthase 1	213.179	813.377	1.93186	5.89893	5e-05	0.00031057
	Zm00001d047054	9:116805363-116810796	Pyruvate kinase isozyme G, chloroplastic	4.94921	18.5387	1.90527	3.56421	5e-05	0.00031057
	Zm00001d011487	8:152072965-152077705	Cytosolic isocitrate dehydrogenase [NADP]	42.3093	158.007	1.90094	5.94757	5e-05	0.00031057
	Zm00001d054067	4:245806160-245807669	Linolenate hydroperoxide lyase, chloroplastic	1.18442	4.40891	1.89625	2.23191	0.002	0.00763302
	Zm00001d013839	5:22102306-22104869	Cytochrome b5	5.22794	18.8243	1.84828	3.4864	5e-05	0.00031057
	Zm00001d027801	1:13815366-13827552	DNA topoisomerase 3-alpha	1.89856	6.82205	1.8453	1.92838	0.0004	0.00196604
	Zm00001d001915	2:2812722-2813940	#N/A	19.1378	67.7601	1.82401	4.3883	5e-05	0.00031057
	Zm00001d042946	3:184666459-184667313	Putative pectate lyase 21	6.24756	21.8939	1.80916	2.59463	0.0001	0.00057936
	Zm00001d017251	5:190355324-190360718	Protein CER1-like 1	2.05219	7.1368	1.79811	2.68464	5e-05	0.00031057
	Zm00001d046422	9:88938384-88941121	Cytochrome P450 734A4	2.91234	10.1182	1.7967	3.09426	5e-05	0.00031057
	Zm00001d037211	6:115981076-115984636	Annexin D7	30.8312	107.04	1.79569	5.16069	5e-05	0.00031057
	Zm00001d038598	6:160693572-160695070	Peroxidase 1	1.77049	6.14402	1.79504	2.39155	0.00065	0.00296301
	Zm00001d042961	3:184964595-184969233	Putative respiratory burst oxidase homolog protein H	16.3019	56.2806	1.7876	5.08143	5e-05	0.00031057
	Zm00001d027511	1:7144391-7146668	Catalase isozyme 2	18.8186	64.5831	1.779	4.36164	5e-05	0.00031057
	Zm00001d043563	3:203950867-203960201	ATP-dependent 6-phosphofructokinase 3	5.15269	17.6446	1.77583	3.876	5e-05	0.00031057
	Zm00001d023372	10:4210184-4213497	Heavy metal-associated isoprenylated plant protein 32	1.85193	6.29978	1.76627	2.68095	5e-05	0.00031057
	Zm00001d051535	4:161759715-161766998	ATPase family AAA domain-containing protein 3-B	3.82488	12.8318	1.74624	4.28306	5e-05	0.00031057
	Zm00001d002876	2:25317219-25323118	E3 ubiquitin-protein ligase HERC2	3.45455	11.5587	1.74241	4.72488	5e-05	0.00031057
	Zm00001d048021	9:148185905-148187354	Allene oxide synthase 2	27.9274	92.8702	1.73353	4.63535	5e-05	0.00031057
	Zm00001d048411	9:155796735-155798414	Heavy metal-associated isoprenylated plant protein 6	7.16014	23.5464	1.71744	3.53784	5e-05	0.00031057
	Zm00001d012228	8:170458718-170462003	4,5-DOPA dioxygenase extradiol	74.8264	243.665	1.70328	4.02135	5e-05	0.00031057
	Zm00001d039079	6:169685196-169688921	Isocitrate dehydrogenase [NADP], chloroplastic (Fragment)	36.3627	118.066	1.69906	5.343	5e-05	0.00031057
	Zm00001d053858	4:242390664-242395306	EH domain-containing protein 1	5.52391	17.817	1.68949	4.47206	5e-05	0.00031057
	Zm00001d003040	2:30082226-30086375	BRCA1-associated RING domain protein 1	3.37703	10.8417	1.68276	4.17802	5e-05	0.00031057
	Zm00001d052653	4:196008354-196012956	Respiratory burst oxidase homolog protein C	4.33225	13.7613	1.66743	2.17919	0.00035	0.00174885
	Zm00001d030020	1:99945343-99950682	Pyruvate kinase isozyme G, chloroplastic	47.5726	150.764	1.66409	4.00858	5e-05	0.00031057
	Zm00001d042211	3:156124102-156127471	PsbP domain-containing protein 7, chloroplastic	2.74297	8.66796	1.65996	2.58992	5e-05	0.00031057
	Zm00001d033683	1:271130285-271131944	Phospholipase A2 homolog 3	2.01984	6.26162	1.6323	2.00038	0.0012	0.00494945
	Zm00001d022313	7:174972192-174977307	Putative SWI/SNF-related matrix-associated actin-dependent regulator of chromatin subfamily A member 3-like 1	1.66231	5.1363	1.62754	3.34453	5e-05	0.00031057
	Zm00001d028550	1:38975758-38978074	LIM domain-containing protein WLIM2a	5.39503	16.5956	1.62109	3.33928	5e-05	0.00031057
	Zm00001d024754	10:86460331-86461525	S-adenosylmethionine synthase 1	59.4285	181.351	1.60956	4.57767	5e-05	0.00031057
	Zm00001d048969	4:11098503-11103144	PHD finger protein At1g33420	3.52714	10.724	1.60427	3.69467	5e-05	0.00031057
	Zm00001d043543	3:203425339-203444747	Respiratory burst oxidase homolog protein F	3.28136	9.77472	1.57476	4.28777	5e-05	0.00031057
	Zm00001d018696	7:2698897-2701382	L-ascorbate oxidase homolog	3.52108	10.4562	1.57027	2.7602	5e-05	0.00031057
	Zm00001d014128	5:33413408-33415521	Heavy metal-associated isoprenylated plant protein 6	4.99258	14.6775	1.55575	3.16641	5e-05	0.00031057
	Zm00001d045431	9:21923412-21927989	Enolase 1	1483.69	4340.31	1.54861	2.08249	0.00025	0.00130155
	Zm00001d001959	2:3543769-3549932	GTP cyclohydrolase 1	3.92738	11.4648	1.54557	3.60195	5e-05	0.00031057
	Zm00001d051554	4:162654596-162657413	Abscisic acid 8'-hydroxylase 1	5.61893	16.331	1.53925	3.25291	5e-05	0.00031057
	Zm00001d014294	5:39803825-39816170	Acetyl-CoA carboxylase 1	3.26551	9.45204	1.53332	4.63099	5e-05	0.00031057
	Zm00001d008210	8:1296795-1298016	Germin-like protein 5-1	3.24637	9.38847	1.53206	1.88863	0.0009	0.00389168
	Zm00001d046784	9:105916517-105918534	Alpha carbonic anhydrase 7	2.93398	8.48243	1.53162	2.32994	0.0004	0.00196604
	Zm00001d044021	3:216967819-216972096	Cytosolic isocitrate dehydrogenase [NADP]	1.62188	4.66776	1.52506	2.78407	5e-05	0.00031057
	Zm00001d032616	1:232178531-232179278	Ubiquitin-40S ribosomal protein S27a	7.61262	21.8535	1.5214	2.62894	5e-05	0.00031057
	Zm00001d035136	6:6620117-6623924	Succinate dehydrogenase [ubiquinone] iron-sulfur subunit 1, mitochondrial	36.9238	105.73	1.51777	4.18565	5e-05	0.00031057
	Zm00001d042108	3:150865318-150865897	Calmodulin-like protein 2	16.6201	47.3974	1.51188	2.67075	5e-05	0.00031057
	Zm00001d039656	3:10861808-10866922	NADH-cytochrome b5 reductase-like protein	23.1764	65.9687	1.50912	4.27599	5e-05	0.00031057
	Zm00001d022102	7:170348044-170350491	Protein PYRICULARIA ORYZAE RESISTANCE 21	29.6919	84.4671	1.50832	4.22634	5e-05	0.00031057
	Zm00001d051129	4:144987565-144994135	Succinate--CoA ligase [ADP-forming] subunit beta, mitochondrial	20.5906	58.5279	1.50714	4.88299	5e-05	0.00031057
	Zm00001d015477	5:92669604-92675745	Protein ECERIFERUM 3	27.2844	77.5257	1.5066	4.33419	5e-05	0.00031057
	Zm00001d009747	8:79418293-79421379	Probable protein phosphatase 2C 53	1.52534	4.26483	1.48336	2.15281	0.00045	0.00217427
	Zm00001d051676	4:166358429-166362930	ADP-ribosylation factor GTPase-activating protein AGD12	6.22536	17.3686	1.48025	3.70622	5e-05	0.00031057
	Zm00001d053671	4:238612588-238613017	Zinc finger A20 and AN1 domain-containing stress-associated protein 8	34.0812	94.6165	1.47311	2.79373	5e-05	0.00031057
	Zm00001d036702	6:98134247-98134569	Diphthamide biosynthesis protein 3	49.1641	136.071	1.46868	2.11164	0.0007	0.00315458
	Zm00001d007180	2:223921920-223925520	Cytochrome P450 714B1	1.51977	4.16656	1.45501	1.9383	0.00205	0.0077849
	Zm00001d044159	3:220748189-220754600	Cytochrome P450 72A15	1.23079	3.35377	1.4462	2.39669	0.0003	0.0015276
	Zm00001d040519	3:47878959-47880339	Germin-like protein 1-1	4.50061	12.2417	1.44361	2.20871	0.00095	0.00406591
	Zm00001d033483	1:263981641-263981944	.	126.664	343.998	1.4414	2.48107	0.0001	0.00057936
	Zm00001d026490	10:146954112-146960946	Plasma membrane ATPase	13.5032	36.5249	1.43557	3.7208	5e-05	0.00031057
	Zm00001d031473	1:191327827-191332219	Aminoacylase-1	45.9544	123.826	1.43004	4.48686	5e-05	0.00031057
	Zm00001d017139	5:186706298-186712746	4-hydroxy-3-methylbut-2-en-1-yl diphosphate synthase (ferredoxin), chloroplastic	2.62571	7.0258	1.41995	3.33746	5e-05	0.00031057
	Zm00001d032468	1:227650950-227651577	Cytochrome P450 84A1	6.59795	17.3202	1.39236	1.91535	0.0022	0.00825909
	Zm00001d053622	4:236999462-237006338	.	8.36299	21.9221	1.3903	2.5956	0.00015	0.000830091
	Zm00001d033180	1:253162490-253166753	Cytochrome P450 85A1	7.14443	18.6812	1.38669	3.28085	5e-05	0.00031057
	Zm00001d020954	7:137626104-137626968	Splicing factor U2af small subunit A	34.7648	90.7882	1.38488	3.52837	5e-05	0.00031057
	Zm00001d022491	7:178668198-178683112	DNA polymerase zeta catalytic subunit	1.58669	4.14185	1.38426	3.7533	5e-05	0.00031057
	Zm00001d051502	4:160498470-160504465	Calcium-dependent protein kinase 5	1.90959	4.97506	1.38145	1.71144	0.00215	0.00809985
	Zm00001d053541	4:233438442-233443072	SH3 domain-containing protein PJ696.02	4.47885	11.6661	1.38112	3.31222	5e-05	0.00031057
	Zm00001d025234	10:110338607-110344763	Probable DNA primase large subunit	2.24032	5.828	1.3793	1.78025	0.00105	0.00442562
	Zm00001d037636	6:132563361-132570425	Probable cellulose synthase A catalytic subunit 1 [UDP-forming]	14.6209	37.9806	1.37723	4.47706	5e-05	0.00031057
	Zm00001d007952	2:243982041-243983760	Peroxidase 51	2.41367	6.26353	1.37575	1.89033	0.00195	0.00746888
	Zm00001d004075	2:80531431-80537038	Probable inactive purple acid phosphatase 27	2.10219	5.43934	1.37154	2.38027	0.0001	0.00057936
	Zm00001d043805	3:210580503-210592391	Zinc finger protein BRUTUS	2.6251	6.7626	1.3652	3.58016	5e-05	0.00031057
	Zm00001d026139	10:139500503-139503230	Calcium-dependent protein kinase 12	2.91504	7.4771	1.35896	2.60064	0.0001	0.00057936
	Zm00001d008214	8:1454271-1456128	Rhomboid-like protein 14, mitochondrial	8.01949	20.4841	1.35292	3.05828	5e-05	0.00031057
	Zm00001d008244	8:2452375-2459944	3-isopropylmalate dehydrogenase, chloroplastic	18.1642	46.2102	1.34711	4.07804	5e-05	0.00031057
	Zm00001d049234	4:22022727-22027004	Serine hydroxymethyltransferase 4	122.184	310.353	1.34486	4.04832	5e-05	0.00031057
	Zm00001d046262	9:77157096-77159734	Cytosolic isocitrate dehydrogenase [NADP]	1.96813	4.99469	1.34357	2.09125	0.00085	0.00371002
	Zm00001d012629	8:177496008-177501834	#N/A	1.01563	2.57685	1.34324	1.80935	0.00045	0.00217427
	Zm00001d053782	4:240980103-240984661	Cytochrome P450 97B2, chloroplastic	1.51602	3.82169	1.33393	2.32196	0.00025	0.00130155
	Zm00001d010236	8:105522083-105524781	Cytochrome c	51.0198	128.378	1.33127	3.80166	5e-05	0.00031057
	Zm00001d013030	5:3472229-3476498	Calcium-dependent protein kinase 8	3.32516	8.36466	1.33088	2.52122	5e-05	0.00031057
	Zm00001d006621	2:212770258-212774000	Calcium-dependent protein kinase 8	8.77881	22.0279	1.32724	3.73044	5e-05	0.00031057
	Zm00001d000046	B73V4_ctg182:1051026-1054330	0	6.21812	15.5782	1.32498	2.36834	0.0002	0.00106912
	Zm00001d004125	2:84495886-84510274	Acetyl-CoA carboxylase 2	27.1987	67.9247	1.3204	3.78783	5e-05	0.00031057
	Zm00001d018159	5:215718400-215720596	Alpha-amylase	14.5718	36.3365	1.31824	3.3005	5e-05	0.00031057
	Zm00001d052136	4:180604676-180607029	1-aminocyclopropane-1-carboxylate oxidase 1	8.02718	19.9589	1.31406	2.52474	5e-05	0.00031057
	Zm00001d024940	10:96012098-96019757	.	5.5009	13.5599	1.3016	2.51094	0.0001	0.00057936
	Zm00001d017707	5:204745660-204751145	ATPase family AAA domain-containing protein 3	18.8438	46.1536	1.29235	3.6868	5e-05	0.00031057
	Zm00001d032467	1:227648294-227649464	Cytochrome P450 84A1	5.59839	13.6116	1.28175	1.89091	0.00225	0.00841279
	Zm00001d045043	9:10913772-10917850	Putative cinnamyl alcohol dehydrogenase 4	4.03682	9.77915	1.27649	2.7024	5e-05	0.00031057
	Zm00001d010309	8:109067494-109086927	Squamosa promoter-binding-like protein 9	7.04038	16.9356	1.26633	3.61725	5e-05	0.00031057
	Zm00001d031667	1:198119171-198130785	ADP-ribosylation factor GTPase-activating protein AGD3	2.98815	7.17687	1.2641	2.58643	5e-05	0.00031057
	Zm00001d011192	8:142592860-142598233	Carbamoyl-phosphate synthase large chain, chloroplastic	9.25947	22.1884	1.2608	3.87276	5e-05	0.00031057
	Zm00001d019149	7:19277317-19283676	Probable cellulose synthase A catalytic subunit 8 [UDP-forming]	7.83826	18.7045	1.25478	3.71924	5e-05	0.00031057
	Zm00001d003197	2:35313290-35313959	Probable calcium-binding protein CML22	7.26215	17.2315	1.24658	1.87396	0.00205	0.0077849
	Zm00001d046344	9:81994756-82001394	Ent-kaurene oxidase 2	3.72177	8.7853	1.2391	2.58553	5e-05	0.00031057
	Zm00001d033421	1:262588024-262589296	Deoxyuridine 5'-triphosphate nucleotidohydrolase	5.37869	12.6955	1.23899	1.91671	0.0012	0.00494945
	Zm00001d020257	7:102493333-102494600	Heavy metal-associated isoprenylated plant protein 23	34.5804	80.8562	1.22541	3.00993	5e-05	0.00031057
	Zm00001d046388	9:86625252-86638592	Probable histone deacetylase 19	8.96584	20.945	1.22409	3.08207	5e-05	0.00031057
	Zm00001d046194	9:71335284-71350665	Probable phospholipid-transporting ATPase 4	6.96018	16.2526	1.22347	3.79699	5e-05	0.00031057
	Zm00001d040446	3:43701924-43707461	Pyruvate kinase, cytosolic isozyme	44.8339	104.245	1.21732	3.87147	5e-05	0.00031057
	Zm00001d011610	8:155807922-155820009	Glutamate synthase 1 [NADH], chloroplastic	21.8363	50.7481	1.21662	3.64739	5e-05	0.00031057
	Zm00001d043674	3:206991600-206992551	Cytidine deaminase 1	15.3301	35.5736	1.21443	2.3802	0.00035	0.00174885
	Zm00001d016347	5:158593845-158598525	Calmodulin	5.05484	11.7193	1.21315	2.73237	5e-05	0.00031057
	Zm00001d014366	5:43072230-43076160	L-ascorbate oxidase homolog	3.95013	9.04061	1.19452	2.44566	0.0001	0.00057936
	Zm00001d042600	3:173133841-173138661	Cytochrome c	4.74582	10.8443	1.1922	1.99778	0.00155	0.00614505
	Zm00001d029149	1:60531178-60535397	Zinc finger protein CONSTANS-LIKE 13	15.1268	34.3424	1.18288	3.3398	5e-05	0.00031057
	Zm00001d016493	5:164627845-164631311	dCTP pyrophosphatase 1	5.61535	12.7429	1.18225	2.1497	0.00035	0.00174885
	Zm00001d005920	2:192761280-192766625	Beta carbonic anhydrase 5, chloroplastic	2.22485	5.03623	1.17864	2.22894	0.00025	0.00130155
	Zm00001d025353	10:115197315-115205461	Protein transport protein Sec24A	5.16663	11.6796	1.17669	3.29787	5e-05	0.00031057
	Zm00001d032172	1:215551745-215556493	ATP-dependent 6-phosphofructokinase 5, chloroplastic	4.61608	10.4186	1.17442	2.86294	5e-05	0.00031057
	Zm00001d008266	8:3527557-3529941	Peroxidase 24	34.9856	78.8945	1.17316	3.12162	5e-05	0.00031057
	Zm00001d035764	6:46340882-46353764	E3 ubiquitin-protein ligase ORTHRUS 2	12.3366	27.8195	1.17315	2.39623	0.00055	0.00257305
	Zm00001d010409	8:113368256-113369757	Peroxidase 29	4.35654	9.81625	1.17199	1.84823	0.00265	0.0096319
	Zm00001d028210	1:26517878-26521293	Replication protein A 70 kDa DNA-binding subunit B	4.10042	9.23067	1.17066	2.83402	5e-05	0.00031057
	Zm00001d004138	2:85736309-85737686	Heavy metal-associated isoprenylated plant protein 27	3.55188	7.94553	1.16156	2.02961	0.00055	0.00257305
	Zm00001d011245	8:144402590-144406381	Protein arginine methyltransferase NDUFAF7 homolog, mitochondrial	4.23996	9.48137	1.16104	2.61244	5e-05	0.00031057
	Zm00001d047303	9:126074526-126075345	.	10.2222	22.8485	1.1604	2.32117	0.00025	0.00130155
	Zm00001d025659	10:125277607-125279663	ATP-dependent 6-phosphofructokinase 2	4.55371	10.147	1.15594	2.23577	0.00025	0.00130155
	Zm00001d012571	8:176802143-176808472	DNA-(apurinic or apyrimidinic site) lyase, chloroplastic	11.7559	26.1438	1.15309	3.29255	5e-05	0.00031057
	Zm00001d046450	9:90491828-90495556	Probable protein phosphatase 2C 57	2.41934	5.36246	1.14828	2.16831	0.00095	0.00406591
	Zm00001d022028	7:168269021-168278683	DNA mismatch repair protein MSH2	3.2769	7.26027	1.14769	2.99942	5e-05	0.00031057
	Zm00001d009858	8:85446293-85449522	Trans-cinnamate 4-monooxygenase	28.1734	62.3826	1.14681	3.21963	5e-05	0.00031057
	Zm00001d034319	1:289129915-289132811	Dihydroceramide fatty acyl 2-hydroxylase FAH1	35.5304	78.5576	1.1447	3.23466	5e-05	0.00031057
	Zm00001d041871	3:141630744-141635343	Calcium-dependent protein kinase 24	4.27726	9.4528	1.14405	2.11036	0.0008	0.00353513
	Zm00001d049049	4:13884939-13892828	Pyruvate kinase 1, cytosolic	9.71378	21.4518	1.14299	3.32396	5e-05	0.00031057
	Zm00001d045326	9:19060452-19065712	ATP-dependent 6-phosphofructokinase 3	1.58667	3.47381	1.13051	2.13286	0.0006	0.00276399
	Zm00001d021087	7:142484401-142493269	ADP-ribosylation factor GTPase-activating protein AGD3	14.3116	30.9672	1.11356	3.65061	5e-05	0.00031057
	Zm00001d038625	6:161162524-161167432	Sulfite reductase [ferredoxin], chloroplastic	53.5727	115.844	1.11262	3.5963	5e-05	0.00031057
	Zm00001d053070	4:212271640-212301061	DNA polymerase delta catalytic subunit	3.2524	7.03035	1.11209	3.20747	5e-05	0.00031057
	Zm00001d033480	1:263882341-263887652	5-methyltetrahydropteroyltriglutamate--homocysteine methyltransferase 1	13.1592	28.3112	1.1053	3.28539	5e-05	0.00031057
	Zm00001d036293	6:82193274-82194916	Caffeoyl-CoA O-methyltransferase 1	107.733	231.125	1.10121	3.37782	5e-05	0.00031057
	Zm00001d036707	6:98270415-98281382	Ubiquitin carboxyl-terminal hydrolase 18	5.60436	11.9922	1.09748	3.32746	5e-05	0.00031057
	Zm00001d043662	3:206196919-206222520	Alpha-amylase 3, chloroplastic	3.34956	7.1402	1.09199	2.90769	5e-05	0.00031057
	Zm00001d015618	5:101493552-101498009	Probable cinnamyl alcohol dehydrogenase	4.50786	9.59331	1.08959	1.94722	0.00135	0.00545852
	Zm00001d029976	1:97209568-97214377	Calcineurin B-like protein 1	17.188	36.4675	1.08521	3.1116	5e-05	0.00031057
	Zm00001d033503	1:264688456-264693791	Probable E3 ubiquitin-protein ligase BAH1-like 1	2.82585	5.96568	1.078	3.0222	5e-05	0.00031057
	Zm00001d027512	1:7148371-7152568	60S ribosomal protein L5-1	22.1589	46.6191	1.07303	3.00698	5e-05	0.00031057
	Zm00001d042107	3:150853651-150855137	Probable calcium-binding protein CML10	12.3219	25.8833	1.0708	1.96978	0.00205	0.0077849
	Zm00001d016491	5:164555550-164557626	40S ribosomal protein S27	45.5574	95.6567	1.07018	2.57591	5e-05	0.00031057
	Zm00001d015842	5:125657036-125657552	Zinc finger A20 and AN1 domain-containing stress-associated protein 4	90.2144	188.95	1.06658	2.81145	5e-05	0.00031057
	Zm00001d045393	9:20521785-20527702	.	8.9783	18.6174	1.05214	1.94691	0.0012	0.00494945
	Zm00001d044156	3:220677999-220680745	Cytochrome P450 72A14	49.7705	103.171	1.05168	2.75217	5e-05	0.00031057
	Zm00001d039859	3:16955373-16956401	.	110.404	227.617	1.04381	2.95607	5e-05	0.00031057
	Zm00001d041710	3:134444987-134458133	Glutathione synthetase, chloroplastic	3.15113	6.46699	1.03723	2.37377	5e-05	0.00031057
	Zm00001d007173	2:223808166-223823179	B3 domain-containing protein Os07g0679700	1.33354	2.72632	1.0317	2.09097	0.0005	0.00237556
	Zm00001d052113	4:180167724-180171484	Replication protein A 70 kDa DNA-binding subunit A	3.33603	6.79006	1.02529	2.50845	5e-05	0.00031057
	Zm00001d004019	2:76032745-76036570	Stearoyl-[acyl-carrier-protein] 9-desaturase 5, chloroplastic	29.3277	59.5658	1.02222	2.88288	5e-05	0.00031057
	Zm00001d004413	2:110314498-110316622	L-3-cyanoalanine synthase 2, mitochondrial	24.2228	48.8303	1.01141	2.83852	5e-05	0.00031057
	Zm00001d039670	3:11500059-11504969	Phospholipase D alpha 1	10.3859	20.9304	1.01097	2.92356	5e-05	0.00031057
	Zm00001d043845	3:211901763-211913669	Glutamate synthase 1 [NADH], chloroplastic	41.4988	83.4842	1.00843	2.91824	5e-05	0.00031057
	Zm00001d011514	8:152940769-152945300	Iron-sulfur cluster assembly protein 1	29.9392	59.9755	1.00234	2.62672	5e-05	0.00031057
	Zm00001d033110	1:250436680-250439909	Inositol monophosphatase 3	5.79152	11.5879	1.00061	2.24745	0.00055	0.00257305
	Zm00001d042080	3:149895427-149910290	F-box protein At3g54460	6.28911	3.14287	-1.00077	-2.6746	5e-05	0.00031057
	Zm00001d022490	7:178662945-178667470	Xylose isomerase	16.358	8.17206	-1.00122	-2.86657	5e-05	0.00031057
	Zm00001d018526	5:222482004-222484957	Probable prolyl 4-hydroxylase 3	27.7606	13.8369	-1.00451	-2.18137	0.00035	0.00174885
	Zm00001d009431	8:64107615-64111865	Farnesyl pyrophosphate synthase	2623.25	1291.93	-1.02183	-2.00636	0.00195	0.00746888
	Zm00001d008620	8:14951975-14953401	.	3623.19	1780.63	-1.02487	-2.35354	5e-05	0.00031057
	Zm00001d015504	5:94160701-94167041	Probable protein phosphatase 2C 11	9.72895	4.77391	-1.02711	-2.54989	0.00015	0.000830091
	Zm00001d040470	3:45272538-45288631	ERI1 exoribonuclease 2	125.42	61.4812	-1.02855	-3.20286	5e-05	0.00031057
	Zm00001d039660	3:10945250-10952016	Probable cellulose synthase A catalytic subunit 1 [UDP-forming]	114.348	55.3878	-1.0458	-3.26493	5e-05	0.00031057
	Zm00001d021488	7:153824986-153861598	Rop guanine nucleotide exchange factor 3	7.44959	3.60364	-1.04771	-2.05966	0.0005	0.00237556
	Zm00001d020908	7:136238438-136243677	ATP phosphoribosyltransferase, chloroplastic	62.3764	30.0842	-1.05199	-3.31567	5e-05	0.00031057
	Zm00001d040571	3:50763984-50771779	Squamosa promoter-binding-like protein 1	7.81955	3.7639	-1.05486	-2.89859	5e-05	0.00031057
	Zm00001d045320	9:18913945-18922479	Transcription elongation factor 1 homolog	30.0936	14.4594	-1.05745	-1.94689	0.0013	0.0052904
	Zm00001d046742	9:104063169-104067761	Ribose-phosphate pyrophosphokinase 2, chloroplastic	36.2154	17.2469	-1.07027	-3.19611	5e-05	0.00031057
	Zm00001d034350	1:290344742-290354306	NIPA-like protein	9.59694	4.55869	-1.07396	-2.99976	5e-05	0.00031057
	Zm00001d039841	3:16413697-16414265	Putative 4-hydroxy-4-methyl-2-oxoglutarate aldolase 2	56.9722	26.8282	-1.0865	-2.22864	0.00045	0.00217427
	Zm00001d014900	5:67332283-67363587	Lysine-specific demethylase 5A	18.6634	8.78759	-1.08668	-3.42921	5e-05	0.00031057
	Zm00001d010235	8:105392132-105402990	Uncharacterized protein At5g08430	14.3392	6.734	-1.09043	-2.41835	0.00015	0.000830091
	Zm00001d010646	8:122873950-122875909	Histone-lysine N-methyltransferase, H3 lysine-9 specific SUVH1	60.1623	28.1078	-1.09789	-3.0945	5e-05	0.00031057
	Zm00001d034005	1:280996413-281000773	YTH domain-containing family protein 1	69.6994	32.0571	-1.1205	-3.57865	5e-05	0.00031057
	Zm00001d033228	1:255219555-255227771	Ornithine aminotransferase, mitochondrial	163.51	75.1825	-1.12091	-3.42106	5e-05	0.00031057
	Zm00001d020549	7:121994153-122009096	5'-nucleotidase domain-containing protein DDB_G0275467	5.353	2.45704	-1.12343	-2.37537	0.00045	0.00217427
	Zm00001d006342	2:205070818-205080041	Mitochondrial amidoxime reducing component 2	104.859	47.965	-1.1284	-3.4699	5e-05	0.00031057
	Zm00001d009193	8:42033252-42035233	GATA transcription factor 23	57.9362	26.501	-1.12842	-2.90401	5e-05	0.00031057
	Zm00001d007121	2:222781920-222806658	Retrovirus-related Pol polyprotein from transposon TNT 1-94	5.69827	2.57336	-1.14687	-3.33748	5e-05	0.00031057
	Zm00001d013278	5:7694322-7714914	Increased DNA methylation 1	9.36493	4.22177	-1.14942	-2.25218	0.00025	0.00130155
	Zm00001d034760	1:301511659-301512118	Ferredoxin-3, chloroplastic	3447.34	1545.36	-1.15754	-3.41042	5e-05	0.00031057
	Zm00001d007213	2:224810258-224820340	D-alanine--D-alanine ligase	9.47851	4.24426	-1.15915	-3.11644	5e-05	0.00031057
	Zm00001d035975	6:63921811-63926812	Chaperone protein dnaJ GFA2, mitochondrial	51.5375	22.9888	-1.16469	-3.54353	5e-05	0.00031057
	Zm00001d031587	1:195526968-195533151	Ubiquitin carboxyl-terminal hydrolase 2	14.0218	6.25152	-1.16539	-3.68023	5e-05	0.00031057
	Zm00001d022160	7:171442294-171444896	Probable calcium-binding protein CML13	116.048	51.6888	-1.16679	-3.46125	5e-05	0.00031057
	Zm00001d046827	9:107405326-107408013	#N/A	4.46877	1.9812	-1.1735	-2.32029	0.00085	0.00371002
	Zm00001d041883	3:142276944-142278755	GATA transcription factor 14	45.0157	19.8187	-1.18356	-3.07591	5e-05	0.00031057
	Zm00001d041214	3:105721653-105727958	Plasma membrane ATPase 2 (Fragment)	32.1836	14.0674	-1.19397	-3.75266	5e-05	0.00031057
	Zm00001d020609	7:124932903-124937862	Respiratory burst oxidase homolog protein F	69.4188	30.2856	-1.19669	-3.5503	5e-05	0.00031057
	Zm00001d053697	4:239382346-239406395	Methyl-CpG-binding domain-containing protein 9	34.694	14.9804	-1.21161	-3.73324	5e-05	0.00031057
	Zm00001d035013	6:1819414-1821213	indolin-2-one monooxygenase	9.19193	3.96179	-1.21422	-2.09105	0.0007	0.00315458
	Zm00001d017560	5:199613953-199621606	Protein indeterminate-domain 12	145.221	61.8527	-1.23134	-3.38475	5e-05	0.00031057
	Zm00001d048391	9:155410693-155411701	GATA transcription factor 10	10.2889	4.36985	-1.23543	-1.85645	0.00245	0.00903408
	Zm00001d000316	B73V4_ctg89:18902-24123	0	7.10193	3.00981	-1.23854	-2.71555	5e-05	0.00031057
	Zm00001d038587	6:160544942-160563220	Transposon TX1 uncharacterized 149 kDa protein	13.997	5.88354	-1.25036	-2.11185	5e-05	0.00031057
	Zm00001d039918	3:19350842-19355642	L-Ala-D/L-amino acid epimerase	6.35844	2.67264	-1.25041	-2.40385	5e-05	0.00031057
	Zm00001d027880	1:16436907-16447108	Increased DNA methylation 1	3.11546	1.30053	-1.26035	-2.11613	0.0006	0.00276399
	Zm00001d053775	4:240849636-240853547	Squamosa promoter-binding-like protein 11	15.0426	6.26892	-1.26276	-2.8616	5e-05	0.00031057
	Zm00001d025241	10:110753798-110756285	Heavy metal-associated isoprenylated plant protein 7	1911.45	795.422	-1.26487	-3.14197	5e-05	0.00031057
	Zm00001d021666	7:159493892-159495965	Isocitrate lyase	146.269	60.8335	-1.26569	-3.57357	5e-05	0.00031057
	Zm00001d014797	5:63622982-63627640	Probable protein phosphatase 2C 60	18.7605	7.79396	-1.26727	-3.34364	5e-05	0.00031057
	Zm00001d015279	5:82559259-82562792	Probable protein phosphatase 2C 10	161.658	66.7962	-1.2751	-3.93499	5e-05	0.00031057
	Zm00001d019446	7:34277109-34278975	Heavy metal-associated isoprenylated plant protein 7	73.6179	30.2827	-1.28156	-3.67306	5e-05	0.00031057
	Zm00001d025988	10:135344275-135347905	GATA transcription factor 26	3.9683	1.61935	-1.2931	-2.60678	0.0001	0.00057936
	Zm00001d003945	2:71037397-71040700	Heavy metal-associated isoprenylated plant protein 7	528.533	214.837	-1.29875	-3.38234	5e-05	0.00031057
	Zm00001d050884	4:128320233-128324274	Probable E3 ubiquitin ligase SUD1	15.6949	6.32016	-1.31226	-2.93716	5e-05	0.00031057
	Zm00001d004363	2:106492267-106494016	3-hydroxyindolin-2-one monooxygenase	17.7335	7.13152	-1.3142	-2.76691	5e-05	0.00031057
	Zm00001d032961	1:244858794-244867417	Ent-copalyl diphosphate synthase 1, chloroplastic	8.95476	3.58772	-1.31959	-2.8888	5e-05	0.00031057
	Zm00001d018199	5:216404524-216421412	Bromodomain-containing protein 1	41.2415	16.3852	-1.33171	-2.96877	5e-05	0.00031057
	Zm00001d023933	10:29995807-29996959	DIBOA-glucoside dioxygenase BX6	21.5147	8.48324	-1.34264	-2.56934	5e-05	0.00031057
	Zm00001d040163	3:29846485-29852954	1-deoxy-D-xylulose 5-phosphate reductoisomerase, chloroplastic	8.23482	3.24147	-1.34509	-2.91501	5e-05	0.00031057
	Zm00001d051345	4:155274021-155300046	Ceramide kinase	6.95678	2.73691	-1.34587	-3.15179	5e-05	0.00031057
	Zm00001d012979	5:2666356-2692291	Pyruvate decarboxylase 2	82.9999	32.3772	-1.35813	-2.63885	5e-05	0.00031057
	Zm00001d037529	6:128190262-128195748	Increased DNA methylation 1	62.8152	24.2418	-1.37362	-4.16134	5e-05	0.00031057
	Zm00001d006199	2:201505640-201507497	Cytochrome P450 71A1	5.88261	2.26058	-1.37976	-2.19964	0.0005	0.00237556
	Zm00001d004123	2:84344352-84356520	Lactoylglutathione lyase	50.1891	19.1885	-1.38714	-4.16986	5e-05	0.00031057
	Zm00001d015589	5:100023066-100024804	Premnaspirodiene oxygenase	6.89048	2.62923	-1.38996	-2.16604	0.0009	0.00389168
	Zm00001d038163	6:150024485-150035717	Pyruvate, phosphate dikinase 1, chloroplastic	1240.37	470.813	-1.39754	-2.73928	5e-05	0.00031057
	Zm00001d037333	6:121792418-121824947	D-tagatose-1,6-bisphosphate aldolase subunit GatY	40.5508	15.317	-1.40459	-4.53828	5e-05	0.00031057
	Zm00001d031635	1:196944232-196947143	Peroxidase 51	349.998	131.74	-1.40966	-4.38377	5e-05	0.00031057
	Zm00001d050606	4:103706599-103714666	Ribonuclease TUDOR 1	305.359	114.441	-1.4159	-3.5983	5e-05	0.00031057
	Zm00001d016640	5:170975263-170982646	Ribonuclease TUDOR 1	263.098	98.6001	-1.41594	-3.73224	5e-05	0.00031057
	Zm00001d017953	5:210785281-210790516	Probable peroxygenase 4	47.0392	17.5725	-1.42054	-3.4631	5e-05	0.00031057
	Zm00001d029134	1:59846903-59876808	.	20.8356	7.74913	-1.42694	-4.66489	5e-05	0.00031057
	Zm00001d017885	5:209614259-209620254	Zinc finger protein CONSTANS-LIKE 10	10.134	3.74951	-1.43443	-3.40813	5e-05	0.00031057
	Zm00001d007709	2:237903356-237908436	Probable E3 ubiquitin-protein ligase ARI7	36.8032	13.5453	-1.44204	-4.19604	5e-05	0.00031057
	Zm00001d034838	1:303465802-303469125	Arginine decarboxylase	5.61295	2.06452	-1.44296	-2.9323	5e-05	0.00031057
	Zm00001d041049	3:92907262-92913722	E3 ubiquitin-protein ligase SINA-like 10	5.80605	2.13425	-1.44383	-2.50769	0.0001	0.00057936
	Zm00001d004167	2:88547086-88552834	Isoflavone 2'-hydroxylase	8.86552	3.2229	-1.45985	-2.60558	0.0002	0.00106912
	Zm00001d031908	1:206405715-206408991	Superoxide dismutase [Cu-Zn], chloroplastic	104.505	37.7931	-1.46738	-4.16485	5e-05	0.00031057
	Zm00001d047681	9:139142382-139155181	Pentatricopeptide repeat-containing protein At5g50990	5.54008	2.00173	-1.46866	-3.42051	5e-05	0.00031057
	Zm00001d027649	1:10105589-10109563	E3 ubiquitin-protein ligase MIEL1	25.0925	9.05799	-1.46999	-3.36451	5e-05	0.00031057
	Zm00001d013725	5:18631980-18633840	Naringenin,2-oxoglutarate 3-dioxygenase	255.268	92.1277	-1.47031	-4.29851	5e-05	0.00031057
	Zm00001d013053	5:3891201-3893064	Probable prolyl 4-hydroxylase 7	35.876	12.7243	-1.49543	-3.37224	5e-05	0.00031057
	Zm00001d033606	1:268494768-268498124	Protein yippee-like	24.321	8.62038	-1.49638	-3.21691	5e-05	0.00031057
	Zm00001d048090	9:149896359-149911347	Probable inactive purple acid phosphatase 1	15.8201	5.6001	-1.49823	-3.0875	5e-05	0.00031057
	Zm00001d034898	1:305074530-305075830	Gibberellin 20 oxidase 1-B	19.3394	6.82107	-1.50347	-2.71382	0.0001	0.00057936
	Zm00001d002128	2:6409518-6412809	Shikimate kinase 3, chloroplastic	201.717	70.8359	-1.50978	-4.21468	5e-05	0.00031057
	Zm00001d032974	1:245150814-245172358	Probable prolyl 4-hydroxylase 7	113.619	39.6533	-1.51869	-2.62381	5e-05	0.00031057
	Zm00001d033925	1:278704406-278706905	CBS domain-containing protein CBSX3, mitochondrial	19.755	6.88125	-1.52148	-3.66538	5e-05	0.00031057
	Zm00001d032386	1:225026375-225031085	Pyrophosphate--fructose 6-phosphate 1-phosphotransferase subunit alpha	594.53	206.434	-1.52607	-4.02026	5e-05	0.00031057
	Zm00001d027319	1:2869706-2878262	4'-phosphopantetheinyl transferase HetI	17.994	6.21822	-1.53294	-3.75626	5e-05	0.00031057
	Zm00001d035974	6:63764139-63769331	Chaperone protein dnaJ GFA2, mitochondrial	40.1206	13.644	-1.55608	-4.45977	5e-05	0.00031057
	Zm00001d014491	5:50064947-50065346	Calcium-binding protein KIC	52.5827	17.8495	-1.55871	-2.19224	0.00125	0.00511616
	Zm00001d008898	8:24390469-24391888	Peroxidase 4	188.868	63.188	-1.57966	-4.45254	5e-05	0.00031057
	Zm00001d019376	7:30724556-30745574	Probable aldehyde oxidase 4	22.1555	7.37438	-1.58707	-4.86774	5e-05	0.00031057
	Zm00001d019054	7:14302766-14311590	Methylmalonate-semialdehyde dehydrogenase [acylating], mitochondrial	163.553	54.3659	-1.58898	-5.04387	5e-05	0.00031057
	Zm00001d003349	2:41028414-41031913	Cytochrome P450 724B1	11.7582	3.90496	-1.59029	-2.80992	5e-05	0.00031057
	Zm00001d029238	1:63325314-63328026	Peptide methionine sulfoxide reductase B5	14.0465	4.61609	-1.60547	-2.58829	5e-05	0.00031057
	Zm00001d038342	6:154871822-154875711	.	25.276	8.28405	-1.60936	-3.75632	5e-05	0.00031057
	Zm00001d028428	1:34690470-34704954	.	23.9794	7.84057	-1.61277	-3.62438	5e-05	0.00031057
	Zm00001d015033	5:72855537-72858777	Phospholipase D delta	13.6694	4.4355	-1.62378	-3.31373	5e-05	0.00031057
	Zm00001d043600	3:204844392-204848290	Ribose-phosphate pyrophosphokinase 3, chloroplastic	10.5454	3.41884	-1.62503	-3.2286	5e-05	0.00031057
	Zm00001d028232	1:27413616-27420137	Superoxide dismutase [Cu-Zn] 2	36.9943	11.8813	-1.63861	-3.32918	5e-05	0.00031057
	Zm00001d002611	2:16718232-16722717	Copper chaperone for superoxide dismutase, chloroplastic	19.4964	6.03573	-1.69161	-3.69531	5e-05	0.00031057
	Zm00001d007383	2:230345637-230366608	Alpha-mannosidase At3g26720	23.0307	7.03651	-1.71063	-4.20302	5e-05	0.00031057
	Zm00001d008367	8:6512707-6516786	50S ribosomal protein HLP, mitochondrial	6.60946	2.00252	-1.72272	-2.78415	5e-05	0.00031057
	Zm00001d025707	10:126903969-126906191	BTB/POZ and TAZ domain-containing protein 2	161.757	48.9568	-1.72424	-5.06503	5e-05	0.00031057
	Zm00001d010758	8:127166351-127183436	Homeobox protein HOX1A	11.9782	3.61875	-1.72685	-4.84329	5e-05	0.00031057
	Zm00001d012199	8:170004526-170012968	CLP protease regulatory subunit CLPX2, mitochondrial	66.5477	19.884	-1.74278	-5.45145	5e-05	0.00031057
	Zm00001d043986	3:215646671-215656976	Pyruvate kinase isozyme G, chloroplastic	91.6293	27.3493	-1.74431	-3.53993	5e-05	0.00031057
	Zm00001d035455	6:26712932-26714735	Zinc finger CCCH domain-containing protein 33	59.9139	17.8556	-1.74651	-4.25896	5e-05	0.00031057
	Zm00001d032501	1:228550972-228553155	Endonuclease 1	12.6735	3.7296	-1.76473	-2.94735	5e-05	0.00031057
	Zm00001d037091	6:111833521-111835548	Cytochrome P450 709B2	11.7926	3.46954	-1.76507	-2.83866	5e-05	0.00031057
	Zm00001d027423	1:4909651-4914685	Protein DOWNY MILDEW RESISTANCE 6	51.8238	15.2106	-1.76854	-4.1263	5e-05	0.00031057
	Zm00001d007765	2:239267458-239269600	Probable prolyl 4-hydroxylase 7	374.506	107.144	-1.80544	-4.33769	5e-05	0.00031057
	Zm00001d030109	1:106376177-106378884	Probable inactive shikimate kinase like 2, chloroplastic	8.32904	2.3702	-1.81314	-3.16284	5e-05	0.00031057
	Zm00001d012015	8:166514040-166517345	Squamosa promoter-binding-like protein 2	13.8508	3.77784	-1.87433	-3.26634	5e-05	0.00031057
	Zm00001d002428	2:12420570-12421886	.	177.977	48.1058	-1.88741	-4.88386	5e-05	0.00031057
	Zm00001d046767	9:104954886-104960193	Zinc finger A20 and AN1 domain-containing stress-associated protein 8	1942.58	524.836	-1.88804	-4.38978	5e-05	0.00031057
	Zm00001d000256	B73V4_ctg100:4351-11693	0	56.5643	14.7564	-1.93855	-5.77241	5e-05	0.00031057
	Zm00001d020808	7:133517157-133521665	Peroxidase 17	74.2581	19.3247	-1.9421	-4.81156	5e-05	0.00031057
	Zm00001d017378	5:193867339-193868107	E3 ubiquitin-protein ligase RMA1H1	16.1899	4.14665	-1.96507	-2.76268	5e-05	0.00031057
	Zm00001d020680	7:127860532-127863145	PHD finger protein PERSISTENT TAPETAL CELL 1	34.1295	8.53208	-2.00005	-4.5466	5e-05	0.00031057
	Zm00001d009580	8:71626295-71629642	Urease accessory protein G	52.2895	12.9987	-2.00815	-5.17559	5e-05	0.00031057
	Zm00001d002880	2:25546608-25550239	3-isopropylmalate dehydrogenase 2, chloroplastic	107.772	26.5792	-2.01961	-6.27295	5e-05	0.00031057
	Zm00001d026638	10:149256533-149258518	Calumenin	22.5325	5.44857	-2.04806	-3.64903	5e-05	0.00031057
	Zm00001d042811	3:180893819-180895226	Nematode resistance protein-like HSPRO2	15.2969	3.34838	-2.1917	-3.51952	5e-05	0.00031057
	Zm00001d029778	1:86529693-86530424	EC protein homolog	370.557	81.0021	-2.19366	-6.14857	5e-05	0.00031057
	Zm00001d016572	5:167860551-167862743	Acetolactate synthase 1, chloroplastic	458.227	99.2437	-2.20701	-6.35942	5e-05	0.00031057
	Zm00001d052475	4:190839084-190842202	Cytochrome P450 90A1	135.677	28.8216	-2.23495	-6.46165	5e-05	0.00031057
	Zm00001d029170	1:60930750-60934311	Superoxide dismutase [Cu-Zn] 4A	188.375	39.8862	-2.23964	-6.30415	5e-05	0.00031057
	Zm00001d034986	6:840920-842925	indole-2-monooxygenase	47.0202	9.90029	-2.24774	-5.56358	5e-05	0.00031057
	Zm00001d047479	9:131494598-131498207	Superoxide dismutase [Cu-Zn] 4A	60.6043	12.3264	-2.29767	-5.21778	5e-05	0.00031057
	Zm00001d026635	10:149245573-149251541	Probable allantoinase	36.4469	7.33685	-2.31256	-6.02856	5e-05	0.00031057
	Zm00001d013759	5:19607075-19608662	Ent-cassadiene C2-hydroxylase	9.05126	1.76628	-2.35741	-3.34178	5e-05	0.00031057
	Zm00001d022494	7:178744243-178745200	Zinc finger CCCH domain-containing protein 54	1306.54	247.363	-2.40106	-7.35423	5e-05	0.00031057
	Zm00001d050336	4:82004912-82010291	Methylcrotonoyl-CoA carboxylase beta chain, mitochondrial	140.234	26.522	-2.40257	-7.27527	5e-05	0.00031057
	Zm00001d012304	8:172140279-172142915	Cytochrome P450 94C1	51.5527	9.18371	-2.4889	-5.60085	5e-05	0.00031057
	Zm00001d035308	6:20483348-20484802	2'-deoxymugineic-acid 2'-dioxygenase	413.746	70.4088	-2.55492	-7.57162	5e-05	0.00031057
	Zm00001d042019	3:147549892-147551603	Cationic peroxidase SPC4	84.1996	13.5043	-2.64039	-6.17034	5e-05	0.00031057
	Zm00001d027422	1:4907156-4909468	PsbP-like protein 1, chloroplastic	26.0181	4.01672	-2.69543	-5.01479	5e-05	0.00031057
	Zm00001d037565	6:129802296-129807428	Gibberellin 2-beta-dioxygenase 2	65.9575	10.0202	-2.71863	-5.77569	5e-05	0.00031057
	Zm00001d035462	6:27973061-27977307	Probable 2-oxoglutarate/Fe(II)-dependent dioxygenase	16.3376	2.3281	-2.81097	-3.60284	5e-05	0.00031057
	Zm00001d025103	10:104219160-104224390	Primary amine oxidase	31.8865	3.89782	-3.03221	-5.7776	5e-05	0.00031057
	Zm00001d010321	8:109459049-109469711	Pyruvate, phosphate dikinase 2	4471.4	541.312	-3.04619	-5.04569	5e-05	0.00031057
	Zm00001d004208	2:91679513-91679914	E3 ubiquitin-protein ligase RHA2B	33.1778	3.57455	-3.21438	-3.03967	0.00085	0.00371002
	Zm00001d027861	1:15582762-15585986	Alanine--glyoxylate aminotransferase 2 homolog 1, mitochondrial	332.276	34.8227	-3.25428	-9.36076	5e-05	0.00031057
	Zm00001d024753	10:86312504-86313524	Peroxidase 5	143.137	6.82862	-4.38966	-8.02434	5e-05	0.00031057
GO:0044815 DNA packaging complex	Zm00001d036250	6:79853752-79854163	Histone H3.2	4.33807	36.2176	3.06157	5.05345	0.00095	0.00406591
	Zm00001d042954	3:184749676-184749988	Histone H4	17.3173	142.766	3.04337	3.3394	0.00025	0.00130155
	Zm00001d044581	3:232470617-232478894	Condensin complex subunit 2	2.51972	12.2158	2.27741	3.96551	5e-05	0.00031057
	Zm00001d006547	2:210775107-210776396	Probable histone H2A.1	48.7837	208.976	2.09887	5.78029	5e-05	0.00031057
	Zm00001d021300	7:148227447-148227942	Histone H2A	13.7933	57.3147	2.05494	3.32062	5e-05	0.00031057
	Zm00001d003730	2:56683254-56683907	Histone H3.2	37.2617	137.468	1.88333	4.17285	5e-05	0.00031057
	Zm00001d039790	3:14754273-14754684	Histone H3.2	33.2533	120.198	1.85384	3.23576	5e-05	0.00031057
	Zm00001d045655	9:31231032-31243303	Condensin complex subunit 3	1.63647	5.73987	1.81043	3.66539	5e-05	0.00031057
	Zm00001d012423	8:174293031-174293445	Histone H2B.2	37.5226	124.028	1.72484	3.40125	5e-05	0.00031057
	Zm00001d005791	2:188810173-188810485	Histone H4	90.785	296.952	1.7097	2.74553	5e-05	0.00031057
	Zm00001d020585	7:123712200-123712512	Histone H4	116.835	362.807	1.63473	2.88857	5e-05	0.00031057
	Zm00001d002543	2:15068320-15068632	Histone H4	83.8098	248.734	1.56941	2.37	0.0003	0.0015276
	Zm00001d013066	5:4147201-4148651	Histone H1	20.4741	58.0451	1.50337	3.74739	5e-05	0.00031057
	Zm00001d041672	3:132881407-132881963	Histone H3.2	11.6922	32.5293	1.47619	2.33028	0.00025	0.00130155
	Zm00001d022396	7:176688274-176696366	Condensin complex subunit 1	1.5685	4.33872	1.46789	3.78746	5e-05	0.00031057
	Zm00001d020584	7:123703833-123704145	Histone H4	58.234	154.02	1.40318	1.9632	0.00185	0.00713834
	Zm00001d012837	5:975109-975562	Probable histone H2A.1	126.346	332.733	1.39698	3.59158	5e-05	0.00031057
	Zm00001d021706	7:160893539-160894808	Histone H2A.4	96.9278	251.994	1.3784	4.09156	5e-05	0.00031057
	Zm00001d044246	3:222967857-222968792	Histone H2A	309.961	801.171	1.37003	4.2156	5e-05	0.00031057
	Zm00001d005789	2:188710661-188711219	Histone H2B.3	22.8867	58.567	1.35558	2.74286	5e-05	0.00031057
	Zm00001d025381	10:116549726-116550765	0	28.3294	71.4083	1.33379	2.90816	5e-05	0.00031057
	Zm00001d051591	4:163976516-163976981	Histone H2B.1	55.0012	134.728	1.29252	2.94297	5e-05	0.00031057
	Zm00001d051478	4:160007879-160008267	Histone H4	192.229	467.261	1.28141	3.01164	5e-05	0.00031057
	Zm00001d012276	8:171739919-171740516	Histone H3.2	174.766	418.799	1.26083	3.78376	5e-05	0.00031057
	Zm00001d003725	2:56544751-56545162	Histone H3.2	28.8245	67.6339	1.23045	1.9107	0.00165	0.00648017
	Zm00001d042730	3:178426778-178427336	Histone H3.2	176.167	393.04	1.15774	3.3751	5e-05	0.00031057
	Zm00001d045268	9:17495379-17496111	Histone H3.2	73.4876	158.643	1.11021	3.04008	5e-05	0.00031057
	Zm00001d042930	3:184418116-184418903	Histone H2B.2	46.243	99.1926	1.101	2.9427	5e-05	0.00031057
	Zm00001d019045	7:14093200-14093758	Histone H2A	298.146	635.128	1.09103	3.31269	5e-05	0.00031057
	Zm00001d016723	5:174196061-174196472	Histone H3.2	129.141	261.097	1.01564	2.34542	0.0002	0.00106912
GO:0055085 transmembrane transport	Zm00001d050577	4:101826607-101828504	Bidirectional sugar transporter SWEET15	11.6583	287.878	4.62603	11.1433	5e-05	0.00031057
	Zm00001d049375	4:28145298-28147754	Zinc transporter 4	14.6543	330.268	4.49424	10.4795	5e-05	0.00031057
	Zm00001d019228	7:22845581-22847553	Zinc transporter 8	32.5593	688.796	4.40294	11.8417	5e-05	0.00031057
	Zm00001d036965	6:107624422-107627557	Zinc transporter 4, chloroplastic	20.2094	381.018	4.23676	11.2249	5e-05	0.00031057
	Zm00001d045491	9:24412253-24419923	SPX domain-containing membrane protein Os06g0129400	1.41624	25.5736	4.17452	7.51337	5e-05	0.00031057
	Zm00001d046226	9:73244261-73250675	ABC transporter C family member 8	1.4871	26.618	4.16183	6.28253	5e-05	0.00031057
	Zm00001d034270	1:288305208-288306599	Mitochondrial import inner membrane translocase subunit TIM14-3	10.3544	146.398	3.82158	7.46262	5e-05	0.00031057
	Zm00001d012259	8:171234042-171236231	Protein NRT1/ PTR FAMILY 5.10	6.05678	68.8692	3.50724	7.15857	5e-05	0.00031057
	Zm00001d002893	2:26045492-26048383	WAT1-related protein At1g25270	1.03808	11.6406	3.48717	3.64976	5e-05	0.00031057
	Zm00001d021653	7:159155246-159157703	Glucose-6-phosphate/phosphate translocator 2, chloroplastic	1.31535	14.6744	3.47979	3.46227	5e-05	0.00031057
	Zm00001d023941	10:30401999-30405639	Polyol transporter 5	1.85774	20.1002	3.43559	5.06468	5e-05	0.00031057
	Zm00001d029497	1:73243640-73246778	Zinc transporter 2	1.56236	16.3402	3.38663	4.29402	5e-05	0.00031057
	Zm00001d012231	8:170532865-170534989	Amino acid permease 8	4.37951	41.8992	3.25808	6.43491	5e-05	0.00031057
	Zm00001d045582	9:27266246-27268081	WAT1-related protein At4g16620	2.12677	18.9622	3.15639	4.63458	5e-05	0.00031057
	Zm00001d020953	7:137599101-137608563	Protein PIN-LIKES 1	1.93912	16.9726	3.12974	6.16276	5e-05	0.00031057
	Zm00001d013809	5:21121346-21127522	Protein DETOXIFICATION 40	3.30827	27.7482	3.06825	5.5547	5e-05	0.00031057
	Zm00001d037816	6:138740452-138748540	S-type anion channel SLAH3	1.80978	15.106	3.06124	4.83322	5e-05	0.00031057
	Zm00001d003861	2:63431222-63436171	Potassium transporter 1	4.15464	32.3602	2.96142	7.05901	5e-05	0.00031057
	Zm00001d053049	4:210622231-210626878	ABC transporter G family member 25	1.03535	8.03096	2.95545	3.96705	5e-05	0.00031057
	Zm00001d052435	4:189981670-189987040	Probable peptide/nitrate transporter At3g43790	6.04728	46.7668	2.95113	7.895	5e-05	0.00031057
	Zm00001d006511	2:210204092-210207784	Glucose-6-phosphate/phosphate translocator 2, chloroplastic	1.33294	10.0117	2.909	3.29717	5e-05	0.00031057
	Zm00001d044442	3:228214807-228222699	ABC transporter G family member 36	1.16123	8.5513	2.88049	6.25608	5e-05	0.00031057
	Zm00001d028401	1:33647426-33651594	Auxin transporter-like protein 1	2.71874	18.7029	2.78226	4.25385	5e-05	0.00031057
	Zm00001d005018	2:154107680-154110474	Protein DETOXIFICATION 21	1.82007	12.1109	2.73424	4.4995	5e-05	0.00031057
	Zm00001d002871	2:25171105-25176433	ABC transporter G family member 11	5.09188	33.4545	2.71593	6.74376	5e-05	0.00031057
	Zm00001d032610	1:232015863-232017318	Aquaporin TIP3-2	1.83206	11.1755	2.6088	2.84516	5e-05	0.00031057
	Zm00001d026156	10:139980858-139983545	Putative glycerol-3-phosphate transporter 1	3.65907	22.0739	2.59279	5.3417	5e-05	0.00031057
	Zm00001d020811	7:133774092-133778933	ABC transporter G family member 11	1.4122	8.34401	2.56279	4.43546	5e-05	0.00031057
	Zm00001d019225	7:22609238-22613134	Amino acid transporter ANT1	4.38853	24.203	2.46337	5.41109	5e-05	0.00031057
	Zm00001d008226	8:1889015-1893402	Probable anion transporter 1, chloroplastic	1.41098	7.70274	2.44868	4.72553	5e-05	0.00031057
	Zm00001d020052	7:88709983-88712122	GDP-mannose transporter GONST4	1.13914	5.86907	2.36519	2.96685	5e-05	0.00031057
	Zm00001d008733	8:18170311-18176375	ABC transporter C family member 3	1.46219	7.24594	2.30905	5.33905	5e-05	0.00031057
	Zm00001d011393	8:149449972-149455213	S-type anion channel SLAH3	1.18706	5.83631	2.29766	2.87287	5e-05	0.00031057
	Zm00001d045667	9:32539609-32542534	Protein NRT1/ PTR FAMILY 3.1	2.33665	11.4184	2.28884	3.80173	5e-05	0.00031057
	Zm00001d015829	5:124544274-124549833	Probable copper-transporting ATPase HMA5	6.78676	32.9925	2.28135	6.63541	5e-05	0.00031057
	Zm00001d003603	2:49591582-49595579	Protein NRT1/ PTR FAMILY 4.3	1.95558	9.40351	2.2656	3.21111	5e-05	0.00031057
	Zm00001d025437	10:118681356-118686385	Amino-acid permease BAT1 homolog	9.08392	42.7941	2.23602	3.01896	5e-05	0.00031057
	Zm00001d033273	1:257009014-257013268	Organic cation/carnitine transporter 7	1.10938	5.19044	2.22611	3.2877	5e-05	0.00031057
	Zm00001d014102	5:32578600-32581159	Putative transporter arsB	1.76061	8.05769	2.19429	3.14105	5e-05	0.00031057
	Zm00001d019226	7:22695879-22699262	Cadmium/zinc-transporting ATPase HMA2	1.6283	7.42661	2.18933	2.26343	5e-05	0.00031057
	Zm00001d051912	4:174430424-174434646	Probable voltage-gated potassium channel subunit beta	15.1214	68.5271	2.18008	5.70139	5e-05	0.00031057
	Zm00001d032268	1:219850204-219860643	Mitochondrial carrier protein MTM1	4.5669	20.091	2.13726	4.64838	5e-05	0.00031057
	Zm00001d014166	5:34841495-34844540	Putative calcium-transporting ATPase 13, plasma membrane-type	8.59859	37.5274	2.12577	5.4697	5e-05	0.00031057
	Zm00001d020325	7:106755371-106760086	Potassium transporter 23	1.91126	8.27154	2.11363	4.77509	5e-05	0.00031057
	Zm00001d016590	5:168752443-168755159	Bidirectional sugar transporter SWEET15	3.08312	13.1669	2.09445	3.16669	0.0001	0.00057936
	Zm00001d011006	8:136509478-136511617	ABC transporter G family member 16	2.13987	9.04949	2.08031	3.14004	5e-05	0.00031057
	Zm00001d004055	2:79794499-79799042	Protein DETOXIFICATION 16	2.8858	12.1642	2.0756	4.48553	5e-05	0.00031057
	Zm00001d014788	5:63149893-63153861	Probable magnesium transporter NIPA6	1.67749	6.93201	2.04697	3.62245	5e-05	0.00031057
	Zm00001d051637	4:165359426-165363035	Protein NRT1/ PTR FAMILY 7.3	1.65147	6.8032	2.04246	3.6849	5e-05	0.00031057
	Zm00001d030496	1:138703291-138711961	Mitochondrial import inner membrane translocase subunit TIM22-3	2.82033	11.2338	1.99391	3.03113	5e-05	0.00031057
	Zm00001d010410	8:113391974-113394577	Aquaporin TIP4-2	9.66392	35.8055	1.8895	4.13129	5e-05	0.00031057
	Zm00001d041004	3:89704603-89708058	Lysine histidine transporter-like 8	5.78502	21.3756	1.88557	3.74822	5e-05	0.00031057
	Zm00001d047709	9:139691721-139692531	Mitoferrin	4.94864	17.9211	1.85656	2.59808	0.0002	0.00106912
	Zm00001d010426	8:114527254-114533597	ABC transporter G family member 15	2.10365	7.61592	1.85612	3.32301	5e-05	0.00031057
	Zm00001d016237	5:151835825-151838198	Aquaporin NIP1-1	1.9583	6.95303	1.82804	2.52811	0.00025	0.00130155
	Zm00001d006493	2:209822230-209825657	Protein DETOXIFICATION 40	3.59504	12.3279	1.77785	2.53108	0.0003	0.0015276
	Zm00001d048506	9:157491127-157491721	Mitochondrial import inner membrane translocase subunit TIM23-2	7.92121	26.7309	1.75471	2.52802	0.00025	0.00130155
	Zm00001d003422	2:43834578-43837696	Amino acid transporter ANTL1	2.53775	8.44359	1.73431	2.48404	0.00015	0.000830091
	Zm00001d032789	1:238195328-238201192	Chaperonin CPN60-2, mitochondrial	25.7341	84.4701	1.71476	5.17288	5e-05	0.00031057
	Zm00001d017557	5:199518261-199519560	Amino acid transporter ANTL1	32.2574	105.828	1.71401	4.47584	5e-05	0.00031057
	Zm00001d025590	10:123321361-123328119	ABC transporter B family member 19	2.25825	7.24067	1.68092	2.96404	5e-05	0.00031057
	Zm00001d037756	6:136399633-136402280	Zinc transporter 7	35.2729	111.107	1.65532	4.7245	5e-05	0.00031057
	Zm00001d033528	1:265772255-265790870	Protein NRT1/ PTR FAMILY 2.11	12.7965	40.2162	1.65203	3.42819	5e-05	0.00031057
	Zm00001d037733	6:135558616-135560426	Aquaporin NIP1-3	3.07602	9.63943	1.64788	2.14378	0.00215	0.00809985
	Zm00001d010115	8:99793882-99798377	Probable anion transporter 2, chloroplastic	2.20569	6.79132	1.62247	2.86082	5e-05	0.00031057
	Zm00001d040125	3:28534286-28541148	Phosphate transporter PHO1-1	1.22794	3.76009	1.61453	2.21718	0.00085	0.00371002
	Zm00001d052434	4:189873711-189877696	Protein ZINC INDUCED FACILITATOR-LIKE 1	3.93039	11.6952	1.57317	2.87234	5e-05	0.00031057
	Zm00001d041229	3:106709674-106715943	CSC1-like protein RXW8	3.04993	9.02696	1.56546	4.01866	5e-05	0.00031057
	Zm00001d002396	2:11915377-11934643	Calcium-transporting ATPase 8, plasma membrane-type	2.09926	6.06405	1.5304	2.63513	5e-05	0.00031057
	Zm00001d034035	1:281753765-281764626	Oligopeptide transporter 3	29.3435	84.3749	1.52377	3.0149	5e-05	0.00031057
	Zm00001d020980	7:138698157-138702131	Probable mitochondrial adenine nucleotide transporter BTL1	1.12487	3.20647	1.51122	2.10995	0.0004	0.00196604
	Zm00001d021569	7:156294945-156300431	Protein DETOXIFICATION 19	2.92776	8.16151	1.47904	2.22573	0.00085	0.00371002
	Zm00001d020623	7:125321585-125322729	Copper transporter 5.1	14.359	39.8044	1.47097	2.6561	5e-05	0.00031057
	Zm00001d023277	10:2014034-2017856	Protein DETOXIFICATION 21	16.6809	45.6246	1.45161	3.72027	5e-05	0.00031057
	Zm00001d011697	8:159028131-159032540	Graves disease carrier protein	5.52333	15.0517	1.44631	3.39663	5e-05	0.00031057
	Zm00001d026490	10:146954112-146960946	Plasma membrane ATPase	13.5032	36.5249	1.43557	3.7208	5e-05	0.00031057
	Zm00001d023929	10:29148233-29154174	Dicarboxylate transporter 1, chloroplastic	38.3097	103.591	1.43513	4.18908	5e-05	0.00031057
	Zm00001d046263	9:77253428-77264289	Amino acid permease 6	13.8061	37.1156	1.42672	3.63553	5e-05	0.00031057
	Zm00001d022083	7:169733648-169737370	Mitochondrial import inner membrane translocase subunit TIM17-2	21.4053	57.4004	1.4231	3.81228	5e-05	0.00031057
	Zm00001d002690	2:19342469-19344477	Aquaporin PIP1-1	21.3864	56.9287	1.41246	3.07142	5e-05	0.00031057
	Zm00001d028784	1:46374275-46377587	Mitoferrin	7.76186	20.6335	1.41052	3.01973	5e-05	0.00031057
	Zm00001d005002	2:153238643-153242689	Probable peptide/nitrate transporter At3g43790	1.49548	3.9697	1.40842	2.09805	0.0008	0.00353513
	Zm00001d039330	3:1992692-2001495	V-type proton ATPase subunit E	33.1225	87.8884	1.40786	4.15742	5e-05	0.00031057
	Zm00001d040340	3:38778972-38786131	Probable vacuolar amino acid transporter YPQ3	1.90511	5.00203	1.39264	2.71114	0.0001	0.00057936
	Zm00001d044445	3:228253461-228257016	V-type proton ATPase subunit c''2	48.0884	123.977	1.36631	4.00096	5e-05	0.00031057
	Zm00001d017427	5:195764466-195767455	Iron-phytosiderophore transporter YSL15	56.5574	145.189	1.36014	4.12922	5e-05	0.00031057
	Zm00001d028102	1:22995809-23008536	Mitochondrial outer membrane protein porin 5	20.9806	53.6992	1.35585	3.80405	5e-05	0.00031057
	Zm00001d012629	8:177496008-177501834	#N/A	1.01563	2.57685	1.34324	1.80935	0.00045	0.00217427
	Zm00001d010198	8:103711080-103714624	Probable magnesium transporter NIPA7	7.07538	17.832	1.33359	3.42234	5e-05	0.00031057
	Zm00001d049910	4:52073478-52076203	Protein DETOXIFICATION 34	3.29701	8.29394	1.3309	2.40961	5e-05	0.00031057
	Zm00001d013243	5:6938132-6943851	Cyclic nucleotide-gated ion channel 2	3.54319	8.87931	1.3254	2.71105	5e-05	0.00031057
	Zm00001d020345	7:108133163-108138123	Putative nucleobase-ascorbate transporter 10	2.629	6.58359	1.32436	2.3951	5e-05	0.00031057
	Zm00001d021620	7:158179237-158180317	ATP synthase subunit gamma, chloroplastic	5.94447	14.8225	1.31817	2.26189	0.00035	0.00174885
	Zm00001d042684	3:176820831-176823217	Protein NRT1/ PTR FAMILY 5.10	3.69244	9.16061	1.31087	2.22754	0.00025	0.00130155
	Zm00001d048362	9:155112475-155116062	Mitochondrial outer membrane protein porin 6	5.34305	13.0862	1.29231	2.99891	5e-05	0.00031057
	Zm00001d004561	2:118161396-118171157	Mitochondrial uncoupling protein 1	3.60993	8.76873	1.2804	2.30117	0.0002	0.00106912
	Zm00001d025665	10:125373154-125379315	Amino acid permease 8	27.2338	66.1195	1.27968	3.44512	5e-05	0.00031057
	Zm00001d038562	6:159894086-159895160	Probable sugar phosphate/phosphate translocator At2g25520	64.9195	153.347	1.24008	3.47407	5e-05	0.00031057
	Zm00001d037492	6:127210248-127215264	Pyrophosphate-energized vacuolar membrane proton pump	9.41693	22.2157	1.23825	3.28577	5e-05	0.00031057
	Zm00001d018183	5:215965774-215970551	Mitochondrial phosphate carrier protein 3, mitochondrial	21.909	51.6202	1.23641	3.67202	5e-05	0.00031057
	Zm00001d039052	6:169320792-169327039	Sugar transporter ERD6-like 6	1.62051	3.76202	1.21506	2.01921	0.0024	0.00888499
	Zm00001d031120	1:178020479-178025593	Cationic amino acid transporter 2, vacuolar	18.9042	43.7068	1.20915	3.74549	5e-05	0.00031057
	Zm00001d031647	1:197308954-197311791	Bidirectional sugar transporter SWEET11	8.01395	18.3311	1.19371	2.05742	0.00225	0.00841279
	Zm00001d038840	6:165624431-165627829	Mitochondrial outer membrane protein porin 2	37.6759	85.7649	1.18674	3.63418	5e-05	0.00031057
	Zm00001d020219	7:100656059-100660194	Mitochondrial outer membrane protein porin of 36 kDa	33.9698	77.0918	1.18233	3.6229	5e-05	0.00031057
	Zm00001d008940	8:26144395-26151066	ABC transporter D family member 2, chloroplastic	1.9515	4.41756	1.17866	2.53864	5e-05	0.00031057
	Zm00001d006821	2:217263982-217264651	Mitochondrial import inner membrane translocase subunit TIM17-1	34.5944	78.0714	1.17426	2.59089	5e-05	0.00031057
	Zm00001d048149	9:150906092-150911289	Mitochondrial outer membrane protein porin 5	20.0802	45.1214	1.16804	3.38234	5e-05	0.00031057
	Zm00001d046591	9:97600587-97605812	Pyrophosphate-energized vacuolar membrane proton pump	3.76976	8.45629	1.16555	2.80123	5e-05	0.00031057
	Zm00001d011918	8:164544655-164552085	Mitochondrial thiamine pyrophosphate carrier	1.88375	4.22008	1.16366	2.3067	0.0005	0.00237556
	Zm00001d044533	3:231100303-231105284	Vacuolar cation/proton exchanger 1a	9.84477	21.8863	1.1526	2.65567	5e-05	0.00031057
	Zm00001d036018	6:66392948-66397775	V-type proton ATPase subunit e1	152.922	339.767	1.15175	3.36539	5e-05	0.00031057
	Zm00001d018187	5:216017753-216022412	Mitochondrial phosphate carrier protein 3, mitochondrial	33.0865	73.3665	1.14888	3.50866	5e-05	0.00031057
	Zm00001d018500	5:221871849-221876358	ABC transporter G family member 28	1.40689	3.09148	1.13578	1.92557	0.00095	0.00406591
	Zm00001d032322	1:222263900-222267470	Nucleobase-ascorbate transporter 6	20.9025	45.861	1.13359	3.21057	5e-05	0.00031057
	Zm00001d013810	5:21182816-21186548	Protein DETOXIFICATION 40	33.9128	74.1458	1.12854	3.29355	5e-05	0.00031057
	Zm00001d021880	7:165322978-165328364	CMP-sialic acid transporter 2	4.9783	10.8464	1.12349	2.79586	5e-05	0.00031057
	Zm00001d031447	1:190284562-190291949	ABC transporter C family member 13	4.25177	9.21322	1.11564	3.24992	5e-05	0.00031057
	Zm00001d039674	3:11575058-11577604	Phosphoenolpyruvate/phosphate translocator 3, chloroplastic	9.09606	19.6906	1.11419	2.40283	5e-05	0.00031057
	Zm00001d025834	10:131395393-131399206	Probable inositol transporter 2	3.54605	7.62198	1.10395	2.13267	0.0002	0.00106912
	Zm00001d018627	7:1335709-1339124	Sugar carrier protein C	5.80543	12.4479	1.10043	1.91499	0.00085	0.00371002
	Zm00001d012562	8:176682154-176683237	Probable sugar phosphate/phosphate translocator At2g25520	12.0715	25.8721	1.09979	2.01394	0.0011	0.00460096
	Zm00001d051014	4:136927071-136932493	CMP-sialic acid transporter 5	3.72998	7.98898	1.09884	2.48476	0.0001	0.00057936
	Zm00001d037017	6:109255099-109256890	Cationic amino acid transporter 8, vacuolar	8.28787	17.6622	1.0916	2.05871	0.00085	0.00371002
	Zm00001d013334	5:8847569-8853272	Folate transporter 1, chloroplastic	3.10818	6.6075	1.08804	1.8646	0.0025	0.00918832
	Zm00001d033818	1:274726909-274729148	Calcium load-activated calcium channel	18.7003	39.6969	1.08596	2.54458	5e-05	0.00031057
	Zm00001d025749	10:128281742-128287294	Inositol transporter 1	2.3086	4.87913	1.0796	2.01884	0.00185	0.00713834
	Zm00001d013254	5:7152542-7158397	ABC transporter B family member 25	5.61132	11.8528	1.07881	2.84266	5e-05	0.00031057
	Zm00001d025977	10:135065679-135068785	Probable metal-nicotianamine transporter YSL16	7.85946	16.5972	1.07844	2.49635	0.0001	0.00057936
	Zm00001d008374	8:6699138-6703444	Sugar transporter ERD6-like 5	2.67972	5.6513	1.0765	2.21882	0.0006	0.00276399
	Zm00001d015658	5:103850841-103855288	Sodium-coupled neutral amino acid transporter 2	6.23523	13.0842	1.06931	2.82964	5e-05	0.00031057
	Zm00001d044665	3:234410698-234417575	V-type proton ATPase subunit C	9.3807	19.6718	1.06837	2.58941	5e-05	0.00031057
	Zm00001d008512	8:11119066-11126014	ABC transporter G family member 7	1.09647	2.28701	1.0606	1.98877	0.001	0.00424841
	Zm00001d030158	1:109418603-109421962	Protein NRT1/ PTR FAMILY 8.3	10.3825	21.3953	1.04315	2.7947	5e-05	0.00031057
	Zm00001d006333	2:204940529-204943456	Organic cation/carnitine transporter 7	2.2192	4.54703	1.03488	1.9487	0.00265	0.0096319
	Zm00001d017171	5:187855557-187860206	Outer envelope pore protein 37, chloroplastic	3.58808	7.32846	1.0303	2.08019	0.0008	0.00353513
	Zm00001d017937	5:210385309-210401948	S-adenosylmethionine carrier 1, chloroplastic/mitochondrial	3.8666	7.87681	1.02655	2.12671	0.0004	0.00196604
	Zm00001d027768	1:13166916-13176199	Putative ion channel POLLUX-like 2	2.03869	4.08455	1.00254	2.26347	0.0003	0.0015276
	Zm00001d005542	2:178096527-178100358	Phosphoenolpyruvate/phosphate translocator 1, chloroplastic	36.5553	73.1162	1.00011	2.57583	5e-05	0.00031057
	Zm00001d000021	B73V4_ctg150:1459855-1464045	0	303.577	148.617	-1.03046	-3.144	5e-05	0.00031057
	Zm00001d044056	3:218044052-218050489	Potassium channel AKT1	55.2235	26.5069	-1.05891	-3.35679	5e-05	0.00031057
	Zm00001d040613	3:53996518-53997786	Outer envelope pore protein 16-2, chloroplastic	210.009	100.696	-1.06045	-3.17587	5e-05	0.00031057
	Zm00001d040562	3:49886320-49902674	ABC transporter B family member 4	7.52915	3.56585	-1.07824	-2.27024	0.0002	0.00106912
	Zm00001d030868	1:164196406-164205410	Putative nucleobase-ascorbate transporter 10	104.481	48.8447	-1.09697	-3.41377	5e-05	0.00031057
	Zm00001d051103	4:142662757-142671086	Chloride channel protein CLC-f	9.36377	4.35944	-1.10295	-2.13463	0.00035	0.00174885
	Zm00001d002952	2:27986030-27988042	Probable aquaporin TIP3-2	26.0543	12.0467	-1.11288	-2.2259	0.0002	0.00106912
	Zm00001d020463	7:116451758-116465310	Sugar transport protein 7	27.3763	12.6022	-1.11925	-2.66482	5e-05	0.00031057
	Zm00001d034358	1:290659742-290663205	Peroxisomal membrane protein 13	73.0559	32.8427	-1.15343	-3.51587	5e-05	0.00031057
	Zm00001d038850	6:165838013-165840784	Probable ADP,ATP carrier protein At5g56450	11.0898	4.9849	-1.15359	-2.13652	0.0005	0.00237556
	Zm00001d051415	4:157604147-157608446	Mechanosensitive ion channel protein 8	16.5413	7.43254	-1.15414	-3.17351	5e-05	0.00031057
	Zm00001d009661	8:74956155-74962734	#N/A	6.56002	2.90137	-1.17697	-2.44561	0.0002	0.00106912
	Zm00001d001984	2:3952211-3954752	Probable amino acid permease 7	25.8946	11.4277	-1.18012	-2.6688	5e-05	0.00031057
	Zm00001d041214	3:105721653-105727958	Plasma membrane ATPase 2 (Fragment)	32.1836	14.0674	-1.19397	-3.75266	5e-05	0.00031057
	Zm00001d002359	2:10788144-10793291	Probable potassium transporter 15	36.8246	15.8088	-1.21994	-3.93417	5e-05	0.00031057
	Zm00001d046616	9:98847756-98851557	E3 ubiquitin-protein ligase KEG	8.00602	3.432	-1.22203	-2.92865	5e-05	0.00031057
	Zm00001d037035	6:109824432-109840047	Cyclic nucleotide-gated ion channel 1	6.89223	2.92199	-1.23802	-3.16264	5e-05	0.00031057
	Zm00001d037576	6:130116711-130119868	Pyrophosphate-energized vacuolar membrane proton pump	724.079	289.656	-1.32181	-3.83835	5e-05	0.00031057
	Zm00001d040864	3:73203867-73290655	Piezo-type mechanosensitive ion channel homolog	13.7748	5.49084	-1.32694	-2.4741	0.0001	0.00057936
	Zm00001d024171	10:52662144-52669708	Mitochondrial import inner membrane translocase subunit TIM14-1	8.50426	3.33945	-1.34858	-2.45188	0.00025	0.00130155
	Zm00001d026135	10:139371671-139375601	Mechanosensitive ion channel protein 8	5.29787	2.02665	-1.38632	-2.57632	5e-05	0.00031057
	Zm00001d026289	10:142956462-142961794	Probable potassium transporter 11	4.28296	1.62755	-1.39591	-2.69493	5e-05	0.00031057
	Zm00001d007118	2:222719141-222722663	V-type proton ATPase subunit F	100.559	38.096	-1.40034	-3.79412	5e-05	0.00031057
	Zm00001d027875	1:16140363-16141359	Solute carrier family 25 member 44	17.0798	6.38235	-1.42013	-2.13803	0.0004	0.00196604
	Zm00001d051044	4:138472339-138473695	Protein PIN-LIKES 2	57.6751	21.4683	-1.42574	-3.84931	5e-05	0.00031057
	Zm00001d043374	3:198030696-198033316	Protein NRT1/ PTR FAMILY 1.2	4.55559	1.6907	-1.43002	-2.1699	0.0006	0.00276399
	Zm00001d048293	9:154011331-154012566	Solute carrier family 25 member 44	17.3895	6.44443	-1.43209	-2.39344	5e-05	0.00031057
	Zm00001d049441	4:30362044-30373591	Glucose-6-phosphate/phosphate translocator 2, chloroplastic	35.5364	13.0253	-1.44799	-4.24015	5e-05	0.00031057
	Zm00001d003941	2:70598354-70604588	Probable metal-nicotianamine transporter YSL6	92.413	33.4334	-1.4668	-4.56819	5e-05	0.00031057
	Zm00001d041308	3:111434916-111440097	K(+) efflux antiporter 3, chloroplastic	2.85366	1.02191	-1.48154	-2.44057	0.00025	0.00130155
	Zm00001d028344	1:31351457-31356305	Metal tolerance protein 4	5.48905	1.95825	-1.48699	-2.69749	5e-05	0.00031057
	Zm00001d011185	8:142292768-142293158	Protein transport protein Sec61 subunit beta	370.937	131.249	-1.49887	-3.51039	5e-05	0.00031057
	Zm00001d029762	1:86130013-86134531	Monosaccharide-sensing protein 2	131.49	46.2435	-1.50763	-4.48481	5e-05	0.00031057
	Zm00001d016922	5:180066186-180076054	#N/A	22.5077	7.85654	-1.51845	-3.68912	5e-05	0.00031057
	Zm00001d015905	5:130027453-130030346	Bidirectional sugar transporter SWEET4	12.6991	4.3208	-1.55536	-2.56497	5e-05	0.00031057
	Zm00001d017713	5:205042878-205045991	Protein NRT1/ PTR FAMILY 8.3	4.05965	1.35307	-1.58512	-2.15327	0.00105	0.00442562
	Zm00001d035664	6:39874419-39878122	Outer envelope pore protein 16-1, chloroplastic	271.038	90.1445	-1.58818	-4.51038	5e-05	0.00031057
	Zm00001d019563	7:42951694-42954861	Aquaporin PIP2-1	2997.87	983.035	-1.60863	-3.88872	5e-05	0.00031057
	Zm00001d008567	8:13146140-13153362	Plastidic glucose transporter 4	126.973	40.7541	-1.63951	-5.00856	5e-05	0.00031057
	Zm00001d002119	2:6125332-6132308	ABC transporter B family member 19	7.09427	2.05439	-1.78794	-4.08766	5e-05	0.00031057
	Zm00001d025889	10:133103779-133106556	Probable metal-nicotianamine transporter YSL12	5.45453	1.55963	-1.80625	-2.67663	0.0001	0.00057936
	Zm00001d028201	1:26041524-26045818	Protein transport protein Sec61 subunit alpha	664.877	187.657	-1.82499	-5.0363	5e-05	0.00031057
	Zm00001d015914	5:130947370-130950710	Bidirectional sugar transporter SWEET4	15.0985	4.14429	-1.8652	-2.81637	5e-05	0.00031057
	Zm00001d021752	7:162190358-162195447	Equilibrative nucleotide transporter 3	15.6931	3.87666	-2.01724	-4.12081	5e-05	0.00031057
	Zm00001d040665	3:57044874-57051682	Protein DETOXIFICATION 45, chloroplastic	19.4188	4.59928	-2.07797	-5.2177	5e-05	0.00031057
	Zm00001d048959	4:10754325-10760391	Aquaporin SIP1-1	435.673	99.2002	-2.13483	-5.15353	5e-05	0.00031057
	Zm00001d046467	9:91188675-91199100	UDP-galactose/UDP-glucose transporter 3	84.3425	18.8691	-2.16023	-6.17201	5e-05	0.00031057
	Zm00001d032279	1:220036839-220043811	ABC transporter A family member 2	49.9084	11.1511	-2.1621	-6.6238	5e-05	0.00031057
	Zm00001d039293	3:1167222-1168320	Aquaporin TIP4-4	23.447	4.89356	-2.26045	-3.02914	5e-05	0.00031057
	Zm00001d048520	9:157714271-157715705	Aquaporin TIP3-1	5576.66	899.516	-2.63218	-6.3151	5e-05	0.00031057
	Zm00001d046243	9:76103854-76112147	Solute carrier family 40 member 1	10.6828	1.40542	-2.92622	-4.71771	5e-05	0.00031057
	Zm00001d049252	4:22932091-22935601	Bidirectional sugar transporter SWEET14	27.8164	3.56384	-2.96443	-4.92757	5e-05	0.00031057
	Zm00001d009494	8:67185375-67188550	Protein DETOXIFICATION 10	10.9341	1.31153	-3.05951	-4.93894	5e-05	0.00031057
	Zm00001d013956	5:26132023-26133292	Aquaporin TIP3-1	1129.28	77.3669	-3.86754	-10.9686	5e-05	0.00031057
GO:0007049 cell cycle	Zm00001d029970	1:97044620-97046748	Cyclin-P4-1	3.38846	34.6384	3.35367	5.36732	5e-05	0.00031057
	Zm00001d015348	5:85736318-85739753	Tubulin beta-3 chain	6.97734	64.74	3.21391	7.46009	5e-05	0.00031057
	Zm00001d040509	3:47520801-47522705	Tubulin beta-5 chain	12.2266	80.2471	2.71443	5.8614	5e-05	0.00031057
	Zm00001d021898	7:165620034-165624084	DNA repair protein RAD51 homolog A	4.24264	27.0393	2.67202	6.33604	5e-05	0.00031057
	Zm00001d019696	7:51335277-51337377	Cyclin-D3-2	2.0844	13.2436	2.6676	3.96046	5e-05	0.00031057
	Zm00001d012556	8:176577452-176580718	Tubulin beta-2 chain	30.1632	161.811	2.42345	7.13302	5e-05	0.00031057
	Zm00001d039537	3:7487244-7530464	Protein ALWAYS EARLY 3	8.54035	44.6414	2.38602	4.83997	5e-05	0.00031057
	Zm00001d044581	3:232470617-232478894	Condensin complex subunit 2	2.51972	12.2158	2.27741	3.96551	5e-05	0.00031057
	Zm00001d033365	1:260370365-260372454	Cyclin-A3-1	11.214	48.795	2.12143	5.25412	5e-05	0.00031057
	Zm00001d039133	6:170759205-170773388	Sister chromatid cohesion 1 protein 1	1.39295	5.99661	2.106	3.80018	5e-05	0.00031057
	Zm00001d010275	8:107054057-107056775	Tubulin beta-2 chain	1.18309	4.99266	2.07725	2.28235	0.0018	0.00698199
	Zm00001d021745	7:162090190-162092437	Cyclin-D6-1	10.0664	40.7148	2.016	4.22081	5e-05	0.00031057
	Zm00001d049273	4:23998239-24004490	Coiled-coil domain-containing protein SCD2	2.13029	8.50648	1.99751	4.41733	5e-05	0.00031057
	Zm00001d034840	1:303626152-303630953	Kinetochore protein nuf2	2.80968	11.0155	1.97106	4.44338	5e-05	0.00031057
	Zm00001d044446	3:228293971-228296826	N-alpha-acetyltransferase 50	15.7576	59.6914	1.92148	4.96537	5e-05	0.00031057
	Zm00001d015164	5:78146031-78151108	Cyclin-T1-1	2.71541	10.222	1.91243	4.52534	5e-05	0.00031057
	Zm00001d027801	1:13815366-13827552	DNA topoisomerase 3-alpha	1.89856	6.82205	1.8453	1.92838	0.0004	0.00196604
	Zm00001d045655	9:31231032-31243303	Condensin complex subunit 3	1.63647	5.73987	1.81043	3.66539	5e-05	0.00031057
	Zm00001d014124	5:33239070-33244411	Cell division control protein 48 homolog E	36.0013	124.96	1.79534	5.68795	5e-05	0.00031057
	Zm00001d021732	7:161616774-161621032	Mixed-linked glucan synthase 2	1.59028	5.4429	1.77509	2.96917	5e-05	0.00031057
	Zm00001d051542	4:161946552-161954535	DNA topoisomerase 2	1.16815	3.91274	1.74396	4.2862	5e-05	0.00031057
	Zm00001d012933	5:2194974-2197929	Mitotic-spindle organizing protein 1B	2.73044	9.13932	1.74296	2.67789	5e-05	0.00031057
	Zm00001d024094	10:44110304-44115719	Sister chromatid cohesion 1 protein 3	1.32745	4.41	1.73213	3.61955	5e-05	0.00031057
	Zm00001d030584	1:146389913-146397654	WD repeat-containing protein 76	1.2382	4.10569	1.72938	2.92736	5e-05	0.00031057
	Zm00001d002342	2:10613064-10616088	Polygalacturonase QRT3	22.7829	74.9261	1.71752	4.65223	5e-05	0.00031057
	Zm00001d013612	5:15364274-15368222	Tubulin beta-4 chain	4.9135	15.7972	1.68485	3.11278	5e-05	0.00031057
	Zm00001d003040	2:30082226-30086375	BRCA1-associated RING domain protein 1	3.37703	10.8417	1.68276	4.17802	5e-05	0.00031057
	Zm00001d014813	5:64068898-64100088	Serine/threonine-protein kinase ATR	2.08455	6.67995	1.6801	4.6316	5e-05	0.00031057
	Zm00001d044672	3:234545896-234549775	#N/A	6.00193	19.1426	1.67329	3.53318	5e-05	0.00031057
	Zm00001d031485	1:191586050-191588335	Cyclin-dependent kinase B2-1	2.77662	8.7377	1.65393	3.02964	5e-05	0.00031057
	Zm00001d025687	10:126206149-126211865	Pachytene checkpoint protein 2 homolog	1.37845	4.30145	1.64178	2.9596	5e-05	0.00031057
	Zm00001d013367	5:9834793-9838085	Tubulin alpha-1 chain	414.35	1265.34	1.61061	3.7545	5e-05	0.00031057
	Zm00001d008216	8:1519034-1521275	Tubulin beta-5 chain	24.7498	73.7944	1.5761	3.98752	5e-05	0.00031057
	Zm00001d006651	2:213473848-213477743	Tubulin alpha-5 chain	25.7145	73.6116	1.51735	4.58971	5e-05	0.00031057
	Zm00001d022396	7:176688274-176696366	Condensin complex subunit 1	1.5685	4.33872	1.46789	3.78746	5e-05	0.00031057
	Zm00001d042131	3:152441250-152450630	Serine/threonine-protein kinase TIO	2.51104	6.90156	1.45864	4.00186	5e-05	0.00031057
	Zm00001d025575	10:122821713-122833327	Synaptonemal complex protein ZEP1	1.67448	4.55292	1.44308	2.28545	0.0006	0.00276399
	Zm00001d027585	1:8485865-8489268	Cyclin-dependent kinase inhibitor 5	5.76086	15.6363	1.44055	2.78721	5e-05	0.00031057
	Zm00001d031118	1:177976719-177983073	#N/A	9.35166	24.9816	1.41757	4.13454	5e-05	0.00031057
	Zm00001d053808	4:241457478-241460882	Protein JASON	9.48	24.9964	1.39876	3.56555	5e-05	0.00031057
	Zm00001d013659	5:16553268-16560294	Protein DYAD	2.97037	7.72373	1.37865	2.91233	5e-05	0.00031057
	Zm00001d037636	6:132563361-132570425	Probable cellulose synthase A catalytic subunit 1 [UDP-forming]	14.6209	37.9806	1.37723	4.47706	5e-05	0.00031057
	Zm00001d006357	2:205658134-205671973	Protein GRIP	2.05901	5.33679	1.37403	3.38215	5e-05	0.00031057
	Zm00001d027373	1:3960299-3964921	Cell division control protein 2 homolog	11.0419	27.6157	1.32251	3.3586	5e-05	0.00031057
	Zm00001d017324	5:192697940-192709743	Replication protein A 32 kDa subunit B	23.8978	58.7365	1.29738	3.73841	5e-05	0.00031057
	Zm00001d041606	3:129567272-129572209	DNA replication licensing factor MCM7	4.92845	12.0479	1.28957	2.95703	5e-05	0.00031057
	Zm00001d019852	7:69871826-69879275	WD repeat and HMG-box DNA-binding protein 1	1.79367	4.31665	1.267	3.13314	5e-05	0.00031057
	Zm00001d023796	10:21488310-21534611	Helicase and polymerase-containing protein TEBICHI	2.84907	6.80118	1.25529	2.86965	5e-05	0.00031057
	Zm00001d019149	7:19277317-19283676	Probable cellulose synthase A catalytic subunit 8 [UDP-forming]	7.83826	18.7045	1.25478	3.71924	5e-05	0.00031057
	Zm00001d045480	9:23973731-23986870	.	3.293	7.84758	1.25285	2.43009	0.00015	0.000830091
	Zm00001d053998	4:244830011-244833977	Wee1-like protein kinase	1.29395	3.02684	1.22603	2.0821	0.0013	0.0052904
	Zm00001d039596	3:8649712-8661900	DNA mismatch repair protein MSH7	2.07636	4.84944	1.22376	3.22364	5e-05	0.00031057
	Zm00001d047482	9:131693046-131697968	#N/A	5.8871	13.6537	1.21366	2.99831	5e-05	0.00031057
	Zm00001d048497	9:157237557-157241000	#N/A	11.5552	26.6619	1.20624	3.01576	5e-05	0.00031057
	Zm00001d028210	1:26517878-26521293	Replication protein A 70 kDa DNA-binding subunit B	4.10042	9.23067	1.17066	2.83402	5e-05	0.00031057
	Zm00001d034166	1:285629980-285647284	Serine/threonine-protein kinase Aurora-3	11.7904	26.5187	1.1694	2.81868	5e-05	0.00031057
	Zm00001d032859	1:240510200-240515727	Cell division control protein 48 homolog A	30.4491	68.4533	1.16872	3.01312	5e-05	0.00031057
	Zm00001d042128	3:152235247-152244672	Crossover junction endonuclease MUS81	3.78533	8.41354	1.15229	2.27545	0.00035	0.00174885
	Zm00001d022028	7:168269021-168278683	DNA mismatch repair protein MSH2	3.2769	7.26027	1.14769	2.99942	5e-05	0.00031057
	Zm00001d038583	6:160510690-160523981	Structural maintenance of chromosomes protein 4	3.85646	8.53974	1.14692	3.74814	5e-05	0.00031057
	Zm00001d028538	1:38586288-38599861	Retrovirus-related Pol polyprotein from transposon TNT 1-94	4.46584	9.74451	1.12566	3.14551	5e-05	0.00031057
	Zm00001d048394	9:155579013-155580382	Cyclin-dependent kinases regulatory subunit 1	17.8321	38.4293	1.10773	2.5246	5e-05	0.00031057
	Zm00001d025722	10:127556444-127565804	ATP-dependent DNA helicase Q-like 5	2.35706	5.07468	1.10633	2.71729	5e-05	0.00031057
	Zm00001d049510	4:32826639-32833033	Probable mixed-linked glucan synthase 6	101.219	215.714	1.09164	3.30714	5e-05	0.00031057
	Zm00001d052113	4:180167724-180171484	Replication protein A 70 kDa DNA-binding subunit A	3.33603	6.79006	1.02529	2.50845	5e-05	0.00031057
	Zm00001d034278	1:288354742-288358020	Protein JASON	4.88363	9.90202	1.01977	2.3055	5e-05	0.00031057
	Zm00001d039718	3:12973561-12977694	Mini-chromosome maintenance complex-binding protein	7.69344	15.5943	1.01932	2.94346	5e-05	0.00031057
	Zm00001d048412	9:155819417-155824302	Transcription factor-like protein DPB	4.02904	8.15981	1.0181	2.28335	0.0002	0.00106912
	Zm00001d043158	3:190364999-190368453	Tubulin beta-6 chain	74.6122	150.974	1.01682	3.20339	5e-05	0.00031057
	Zm00001d017895	5:209709533-209717529	Cellulose synthase-like protein E2	3.82692	1.90733	-1.00463	-2.04567	0.00065	0.00296301
	Zm00001d039660	3:10945250-10952016	Probable cellulose synthase A catalytic subunit 1 [UDP-forming]	114.348	55.3878	-1.0458	-3.26493	5e-05	0.00031057
	Zm00001d044630	3:233620683-233628588	Suppressor of mec-8 and unc-52 protein homolog 2	10.0765	4.8084	-1.06737	-2.77566	5e-05	0.00031057
	Zm00001d026030	10:136396306-136404366	Cyclin-T1-3	12.6597	5.83606	-1.11718	-2.74885	5e-05	0.00031057
	Zm00001d048366	9:155189792-155191697	.	16.5827	7.18297	-1.20703	-2.37613	5e-05	0.00031057
	Zm00001d044278	3:223869823-223874157	DNA repair protein RAD51 homolog 3	26.2153	11.1147	-1.23794	-3.37443	5e-05	0.00031057
	Zm00001d039498	3:6001072-6005346	Serine/threonine-protein kinase Aurora-1	7.76261	3.01583	-1.36398	-2.66588	5e-05	0.00031057
	Zm00001d048065	9:149248148-149254231	Tubulin alpha-2 chain	145.926	55.6301	-1.3913	-4.21848	5e-05	0.00031057
	Zm00001d004036	2:77705737-77717321	Protein XRI1	3.68408	1.25638	-1.55203	-2.44168	5e-05	0.00031057
	Zm00001d025182	10:108128002-108131484	Protein XRI1	10.2228	3.45221	-1.5662	-3.30919	5e-05	0.00031057
	Zm00001d041972	3:146279424-146282802	Cellulose synthase-like protein G2	4.88287	1.63914	-1.5748	-2.27895	0.0004	0.00196604
	Zm00001d022041	7:168429143-168434437	#N/A	49.985	13.9865	-1.83746	-5.50739	5e-05	0.00031057
	Zm00001d042357	3:163188683-163192336	Protein XRI1	6.07266	1.69729	-1.8391	-3.16138	5e-05	0.00031057
	Zm00001d000329	B73V4_ctg247:802-19871	0	6.02071	1.50784	-1.99745	-3.96331	5e-05	0.00031057

## Sheet: Heatmap Figure6B
Heatmap shows the changes in the expression levels of storage protein, transporter, and cell cycle related genes in WT and sh4 endosperm
	gene ID	locus	Description	WT	sh4	log2(fold_change)	test_stat	p_value	q_value
Storage protein	Zm00001d011853	8:162805916-162807020	Germin-like protein 1-3	1.31251	8.37682	2.67408	3.80228	0.00095	0.00406591	Germin-like protein 1-3
	Zm00001d025059	10:102054801-102055944	Germin-like protein 8-12	83.3911	344.067	2.04472	5.86547	5e-05	0.00031057	Germin-like protein 8-12
	Zm00001d029062	1:56855735-56858177	Vicilin-like seed storage protein At2g28490	176.64	87.9805	-1.00556	-2.83323	5e-05	0.00031057	Vicilin-like storage protein
	Zm00001d048176	9:151547407-151550218	Vicilin-like seed storage protein At2g18540	525.401	234.472	-1.164	-2.57697	5e-05	0.00031057	Vicilin-like storage protein
	Zm00001d035700	6:41696311-41698431	Glutelin type-B 1	4592.53	992.728	-2.20982	-3.90999	5e-05	0.00031057	Glutelin type-B 1
	Zm00001d005793	2:188849022-188849574	16 kDa gamma-zein	59790.7	3384.09	-4.14308	-6.92898	5e-05	0.00031057	16 kDa gamma-zein
	Zm00001d048817	4:5939852-5940653	22 kDa alpha-zein 14	1267.68	34.7445	-5.18926	-12.6468	5e-05	0.00031057	22 kDa alpha-zein 14
	Zm00001d048808	4:5850647-5851046	Protein FLOURY 2	1890.67	39.2822	-5.58888	-10.4579	5e-05	0.00031057	Protein FLOURY 2
	Zm00001d048851	4:6353979-6354684	floury4; Zein-alpha A30	2482.85	44.2263	-5.81095	-12.4066	5e-05	0.00031057	floury4; Zein-alpha A30
	Zm00001d020591	7:123954262-123955189	50 kDa gamma-zein	20402.3	339.427	-5.90949	-6.60988	5e-05	0.00031057	50 kDa gamma-zein
	Zm00001d019155	7:19534999-19549755	Zein-alpha A20	9783.6	117.653	-6.37776	-11.5977	5e-05	0.00031057	Zein-alpha A20
	Zm00001d048847	4:6292791-6293595	Zein-alpha Z4	4363.99	19.082	-7.83729	-13.927	5e-05	0.00031057	Zein-alpha Z4
	Zm00001d030855	1:163526101-163526827	Zein-alpha 19D1	10041.2	25.4226	-8.62561	-14.4049	5e-05	0.00031057	Zein-alpha 19D1
	Zm00001d048852	4:6358441-6359146	Zein-alpha A30	1187.58	2.87058	-8.69246	-14.9232	5e-05	0.00031057	Zein-alpha A30
Transporter	Zm00001d050577	4:101826607-101828504	Bidirectional sugar transporter SWEET15a	11.6583	287.878	4.62603	11.1433	5e-05	0.00031057	SWEET15a
	Zm00001d016590	5:168752443-168755159	Bidirectional sugar transporter SWEET15b	3.08312	13.1669	2.09445	3.16669	0.0001	0.00057936	SWEET15b
	Zm00001d031647	1:197308954-197311791	Bidirectional sugar transporter SWEET11a	8.01395	18.3311	1.19371	2.05742	0.00225	0.00841279	SWEET11a
	Zm00001d015905	5:130027453-130030346	Bidirectional sugar transporter SWEET4a	12.6991	4.3208	-1.55536	-2.56497	5e-05	0.00031057	SWEET4a
	Zm00001d015914	5:130947370-130950710	Bidirectional sugar transporter SWEET4b	15.0985	4.14429	-1.8652	-2.81637	5e-05	0.00031057	SWEET4b
	Zm00001d049252	4:22932091-22935601	Bidirectional sugar transporter SWEET14b	27.8164	3.56384	-2.96443	-4.92757	5e-05	0.00031057	SWEET14b
	Zm00001d049375	4:28145298-28147754	Zinc transporter 4	14.6543	330.268	4.49424	10.4795	5e-05	0.00031057	Zinc transporter 4
	Zm00001d019228	7:22845581-22847553	Zinc transporter 8	32.5593	688.796	4.40294	11.8417	5e-05	0.00031057	Zinc transporter 8
	Zm00001d036965	6:107624422-107627557	Zinc transporter 5	20.2094	381.018	4.23676	11.2249	5e-05	0.00031057	Zinc transporter 5
	Zm00001d029497	1:73243640-73246778	Zinc transporter 2	1.56236	16.3402	3.38663	4.29402	5e-05	0.00031057	Zinc transporter 2
	Zm00001d037756	6:136399633-136402280	Zinc transporter 7	35.2729	111.107	1.65532	4.7245	5e-05	0.00031057	Zinc transporter 7
	Zm00001d015829	5:124544274-124549833	Probable copper-transporting ATPase HMA5	6.78676	32.9925	2.28135	6.63541	5e-05	0.00031057	Heavy metal ATPase7
	Zm00001d020623	7:125321585-125322729	Copper transporter 5.1	14.359	39.8044	1.47097	2.6561	5e-05	0.00031057	Copper transporter1
	Zm00001d019226	7:22695879-22699262	Cadmium/zinc-transporting ATPase HMA2	1.6283	7.42661	2.18933	2.26343	5e-05	0.00031057	Cadmium/zinc-transporting ATPase
	Zm00001d014166	5:34841495-34844540	Putative calcium-transporting ATPase 13, plasma membrane-type	8.59859	37.5274	2.12577	5.4697	5e-05	0.00031057	Calcium-transporting ATPase 13
	Zm00001d002396	2:11915377-11934643	Calcium-transporting ATPase 8, plasma membrane-type	2.09926	6.06405	1.5304	2.63513	5e-05	0.00031057	Calcium-transporting ATPase 8
	Zm00001d014788	5:63149893-63153861	Probable magnesium transporter NIPA6	1.67749	6.93201	2.04697	3.62245	5e-05	0.00031057	Magnesium transporter NIPA6
	Zm00001d010198	8:103711080-103714624	Probable magnesium transporter NIPA7	7.07538	17.832	1.33359	3.42234	5e-05	0.00031057	Magnesium transporter NIPA7
	Zm00001d025977	10:135065679-135068785	Probable metal-nicotianamine transporter YSL16	7.85946	16.5972	1.07844	2.49635	0.0001	0.00057936	YSL3
	Zm00001d025889	10:133103779-133106556	Probable metal-nicotianamine transporter YSL12	5.45453	1.55963	-1.80625	-2.67663	0.0001	0.00057936	YSL12
Cell cycle	Zm00001d029970	1:97044620-97046748	Cyclin-P4-1	3.38846	34.6384	3.35367	5.36732	5e-05	0.00031057	Cyclin-P4-1
	Zm00001d019696	7:51335277-51337377	Cyclin-D3-2	2.0844	13.2436	2.6676	3.96046	5e-05	0.00031057	Cyclin-D3-2
	Zm00001d033365	1:260370365-260372454	Cyclin-A3-1	11.214	48.795	2.12143	5.25412	5e-05	0.00031057	Cyclin-A3-1
	Zm00001d021745	7:162090190-162092437	Cyclin-D6-1	10.0664	40.7148	2.016	4.22081	5e-05	0.00031057	Cyclin-D6-1
	Zm00001d015164	5:78146031-78151108	Cyclin-T1-1	2.71541	10.222	1.91243	4.52534	5e-05	0.00031057	Cyclin-T1-1
	Zm00001d026030	10:136396306-136404366	Cyclin-T1-3	12.6597	5.83606	-1.11718	-2.74885	5e-05	0.00031057	Cyclin-T1-3
	Zm00001d031485	1:191586050-191588335	Cyclin-dependent kinase B2-1	2.77662	8.7377	1.65393	3.02964	5e-05	0.00031057	CDK B2-1
	Zm00001d027585	1:8485865-8489268	Cyclin-dependent kinase inhibitor 5	5.76086	15.6363	1.44055	2.78721	5e-05	0.00031057	CDK inhibitor 5
	Zm00001d048394	9:155579013-155580382	Cyclin-dependent kinases regulatory subunit 1	17.8321	38.4293	1.10773	2.5246	5e-05	0.00031057	CDK regulatory subunit 1
	Zm00001d044581	3:232470617-232478894	Condensin complex subunit 2	2.51972	12.2158	2.27741	3.96551	5e-05	0.00031057	Condensin complex subunit 2
	Zm00001d045655	9:31231032-31243303	Condensin complex subunit 3	1.63647	5.73987	1.81043	3.66539	5e-05	0.00031057	Condensin complex subunit 3
	Zm00001d022396	7:176688274-176696366	Condensin complex subunit 1	1.5685	4.33872	1.46789	3.78746	5e-05	0.00031057	Condensin complex subunit 1
	Zm00001d039133	6:170759205-170773388	Sister chromatid cohesion 1 protein 1	1.39295	5.99661	2.106	3.80018	5e-05	0.00031057	Sister chromatid cohesion 1
	Zm00001d024094	10:44110304-44115719	Sister chromatid cohesion 1 protein 3	1.32745	4.41	1.73213	3.61955	5e-05	0.00031057	Sister chromatid cohesion 1
	Zm00001d036250	6:79853752-79854163	Histone H3.2	4.33807	36.2176	3.06157	5.05345	0.00095	0.00406591	Histone H3.2
	Zm00001d042954	3:184749676-184749988	Histone H4	17.3173	142.766	3.04337	3.3394	0.00025	0.00130155	Histone H4
	Zm00001d006547	2:210775107-210776396	Probable histone H2A.1	48.7837	208.976	2.09887	5.78029	5e-05	0.00031057	Probable histone H2A.1
	Zm00001d021300	7:148227447-148227942	Histone H2A	13.7933	57.3147	2.05494	3.32062	5e-05	0.00031057	Histone H2A
	Zm00001d003730	2:56683254-56683907	Histone H3.2	37.2617	137.468	1.88333	4.17285	5e-05	0.00031057	Histone H3.2
	Zm00001d039790	3:14754273-14754684	Histone H3.2	33.2533	120.198	1.85384	3.23576	5e-05	0.00031057	Histone H3.2
	Zm00001d012423	8:174293031-174293445	Histone H2B.2	37.5226	124.028	1.72484	3.40125	5e-05	0.00031057
	Zm00001d005791	2:188810173-188810485	Histone H4	90.785	296.952	1.7097	2.74553	5e-05	0.00031057
	Zm00001d020585	7:123712200-123712512	Histone H4	116.835	362.807	1.63473	2.88857	5e-05	0.00031057
	Zm00001d002543	2:15068320-15068632	Histone H4	83.8098	248.734	1.56941	2.37	0.0003	0.0015276
	Zm00001d013066	5:4147201-4148651	Histone H1	20.4741	58.0451	1.50337	3.74739	5e-05	0.00031057
	Zm00001d041672	3:132881407-132881963	Histone H3.2	11.6922	32.5293	1.47619	2.33028	0.00025	0.00130155
	Zm00001d020584	7:123703833-123704145	Histone H4	58.234	154.02	1.40318	1.9632	0.00185	0.00713834
	Zm00001d012837	5:975109-975562	Probable histone H2A.1	126.346	332.733	1.39698	3.59158	5e-05	0.00031057
	Zm00001d021706	7:160893539-160894808	Histone H2A.4	96.9278	251.994	1.3784	4.09156	5e-05	0.00031057
	Zm00001d044246	3:222967857-222968792	Histone H2A	309.961	801.171	1.37003	4.2156	5e-05	0.00031057
	Zm00001d005789	2:188710661-188711219	Histone H2B.3	22.8867	58.567	1.35558	2.74286	5e-05	0.00031057
	Zm00001d051591	4:163976516-163976981	Histone H2B.1	55.0012	134.728	1.29252	2.94297	5e-05	0.00031057
	Zm00001d051478	4:160007879-160008267	Histone H4	192.229	467.261	1.28141	3.01164	5e-05	0.00031057
	Zm00001d012276	8:171739919-171740516	Histone H3.2	174.766	418.799	1.26083	3.78376	5e-05	0.00031057
	Zm00001d003725	2:56544751-56545162	Histone H3.2	28.8245	67.6339	1.23045	1.9107	0.00165	0.00648017
	Zm00001d042730	3:178426778-178427336	Histone H3.2	176.167	393.04	1.15774	3.3751	5e-05	0.00031057
	Zm00001d045268	9:17495379-17496111	Histone H3.2	73.4876	158.643	1.11021	3.04008	5e-05	0.00031057
	Zm00001d042930	3:184418116-184418903	Histone H2B.2	46.243	99.1926	1.101	2.9427	5e-05	0.00031057
	Zm00001d019045	7:14093200-14093758	Histone H2A	298.146	635.128	1.09103	3.31269	5e-05	0.00031057
	Zm00001d016723	5:174196061-174196472	Histone H3.2	129.141	261.097	1.01564	2.34542	0.0002	0.00106912

## Sheet: Heatmap Figure 6D
Heatmap shows the changes in the expression levels of starch synthesis related genes in WT and sh4 endosperm
Gene name	gene ID	locus	Description	WT	sh4	log2(fold_change)	p_value	q_value
Sus1	Zm00001d047253	9:124178171-124184872	Sucrose synthase 2	198.244	162.289	-0.288716	0.2641	0.381281
Sus2	Zm00001d029091	1:57485975-57493258	Sucrose synthase 4	37.5351	16.795	-1.1602	5e-05	0.00031057
Sus3	Zm00001d029087	1:57457545-57464810	Sucrose synthase 4	53.0528	22.1441	-1.26051	5e-05	0.00031057
Sh1	Zm00001d045042	9:10906933-10912944	shrunken1; Sucrose synthase 1	8305.37	1371.71	-2.59807	5e-05	0.00031057
Ugp1	Zm00001d006309	2:204243912-204249878	UTP--glucose-1-phosphate uridylyltransferase	236.805	277.977	0.231262	0.38615	0.50873
Ugp2	Zm00001d021421	7:151705668-151712216	UTP--glucose-1-phosphate uridylyltransferase	594.18	613.105	0.0452343	0.87835	0.916179
Pgm1	Zm00001d013428	5:11195009-11201017	Phosphoglucomutase, cytoplasmic 1	216.023	267.04	0.30587	0.14635	0.247285
Pgm2	Zm00001d033746	1:272697869-272704606	Phosphoglucomutase, cytoplasmic 2	193.949	193.048	-0.006713	0.98755	0.991309
Pgm	Zm00001d044211	3:221916357-221924640	Phosphoglucomutase, chloroplastic	4.20628	6.48932	0.625522	0.0679	0.135997
Gpt	Zm00001d000021	B73V4_ctg150:1459855-1464045	0	303.577	148.617	-1.03046	5e-05	0.00031057
Bt2	Zm00001d050032	4:61315574-61321350	brittle endosperm2; Glucose-1-phosphate adenylyltransferase small subunit, chloroplastic/amyloplastic	1779.89	1108.06	-0.683749	0.0451	0.0984247
Sh2	Zm00001d044129	3:219979957-219989574	shrunken2; Glucose-1-phosphate adenylyltransferase large subunit, chloroplastic/amyloplastic (Fragment)	2905.3	1033.65	-1.49094	0.00025	0.00130155
AGPL1	Zm00001d033910	1:278289783-278294463	Glucose-1-phosphate adenylyltransferase large subunit 1, chloroplastic	51.1048	38.9109	-0.393285	0.03935	0.0880808
AGPL2	Zm00001d039131	6:170732906-170739381	Glucose-1-phosphate adenylyltransferase large subunit, chloroplastic/amyloplastic	29.4613	75.9028	1.36533	5e-05	0.00031057
AGPL3	Zm00001d019266	7:24811759-24822600	Glucose-1-phosphate adenylyltransferase large subunit 2, chloroplastic	10.166	19.1316	0.912211	5e-05	0.00031057
AGPS1	Zm00001d032385	1:224920492-224925108	Glucose-1-phosphate adenylyltransferase small subunit, chloroplastic/amyloplastic	1.48601	2.52236	0.763328	0.0224	0.0562198
AGPS2	Zm00001d005546	2:178195809-178206466	Glucose-1-phosphate adenylyltransferase small subunit, chloroplastic/amyloplastic	88.7134	51.604	-0.781668	5e-05	0.00031057
Bt1	Zm00001d015746	5:115748851-115750963	brittle endosperm1; Adenine nucleotide transporter BT1, chloroplastic/amyloplastic/mitochondrial	3698.62	2543.6	-0.540112	0.08305	0.158807
Wx1	Zm00001d045462	9:23107328-23111318	waxy1; GBSSI; Granule-bound starch synthase 1, chloroplastic/amyloplastic	23.4732	4.25621	-2.46337	5e-05	0.00031057
Pho1	Zm00001d034074	1:283220927-283230016	Alpha-1,4 glucan phosphorylase L isozyme, chloroplastic/amyloplastic	277.031	286.661	0.0492989	0.8698	0.910596
Pho2	Zm00001d042842	3:181808568-181820628	Alpha-glucan phosphorylase, H isozyme	16.7454	9.40256	-0.832635	0.0176	0.0461519
DPE1	Zm00001d022206	7:172841223-172852483	4-alpha-glucanotransferase DPE1, chloroplastic/amyloplastic	40.7049	21.5832	-0.915292	5e-05	0.00031057
SSI	Zm00001d045261	9:17401821-17412594	Soluble starch synthase 1, chloroplastic/amyloplastic	370.151	275.15	-0.427895	0.05665	0.118243
SSIIa	Zm00001d037234	6:117124064-117128209	Soluble starch synthase 2-3, chloroplastic/amyloplastic	344.385	198.342	-0.796032	5e-05	0.00031057
SSIIb	Zm00001d052263	4:185228833-185234452	Soluble starch synthase 2-2, chloroplastic/amyloplastic	1.27003	0.630817	-1.00957	0.02875	0.0684266
SSIIc	Zm00001d014150	5:34229298-34244983	Soluble starch synthase 2-1, chloroplastic/amyloplastic	3.59048	4.63124	0.36722	0.1358	0.233073
SSIIIa	Zm00001d000002	B73V4_ctg150:193400-204736	0	159.621	87.9987	-0.859095	0.00155	0.00614505
SSIIIb	Zm00001d026337	10:143786831-143796162	Soluble starch synthase 3, chloroplastic/amyloplastic	2.3539	6.08395	1.36995	5e-05	0.00031057
SSIV	Zm00001d010821	8:128734661-128743577	Probable starch synthase 4, chloroplastic/amyloplastic	15.9643	9.52445	-0.745144	0.00025	0.00130155
SSV	Zm00001d051976	4:175714875-175730530	Probable starch synthase 4, chloroplastic/amyloplastic	24.2546	10.6951	-1.1813	5e-05	0.00031057
SBEI	Zm00001d014844	5:65186101-65197475	Protein LAZ1	625.486	455.137	-0.458677	0.27495	0.393436
SBEIIa	Zm00001d003817	2:60752442-60763179	1,4-alpha-glucan-branching enzyme 2, chloroplastic/amyloplastic	55.7277	153.503	1.4618	5e-05	0.00031057
Ae1	Zm00001d016684	5:172412994-172430415	amylose extender1; SBEIIb; 1,4-alpha-glucan-branching enzyme 2, chloroplastic/amyloplastic	738.948	357.718	-1.04665	0.0003	0.0015276
SBEIII	Zm00001d011301	8:146174055-146176755	1,4-alpha-glucan-branching enzyme 3, chloroplastic/amyloplastic	1.48942	2.3826	0.677786	0.02495	0.061161
Su1	Zm00001d049753	4:43110568-43119167	sugary1; ISA1; Isoamylase 1, chloroplastic	202.622	110.541	-0.874214	5e-05	0.00031057
ISA2	Zm00001d038121	6:148612408-148616192	Isoamylase 2, chloroplastic	6.0837	4.4041	-0.466104	0.0632	0.128745
ISA3	Zm00001d020799	7:133232802-133244605	Isoamylase 3, chloroplastic	2.6792	4.24504	0.663976	0.00935	0.0276436
Zpu1	Zm00001d004438	2:111722005-111775606	pullulanase-type starch debranching enzyme1; Pullulanase 1, chloroplastic	103.724	19.5648	-2.40641	5e-05	0.00031057
